# Supplementary material
Source: PubMed Central journal article supplement (PMC7260940)
Supplement: pnas.1921984117.sapp.pdf [file pnas.1921984117.sapp.pdf]

1

## 2 **Supplementary Information for**

### 3 **Indirect Reciprocity with Simple Records**

4 **Daniel Clark, Drew Fudenberg, Alexander Wolitzky**

5 **Drew Fudenberg.**

6 **E-mail: [drew.fudenberg@gmail.com](mailto:drew.fudenberg@gmail.com)**

#### 7 **This PDF file includes:**

8     Supplementary text

9     Fig. S1

10    SI References

## 11 Supporting Information Text

### 12 Related Work

13 Work on equilibrium cooperation in repeated games began with studies of reciprocal altruism with general stage games where  
14 a fixed set of players interacts repeatedly with a commonly known start date and a common notion of calendar time (1–3),  
15 and has been expanded to allow for various sorts of noise and imperfect observability (4–8). In contrast, most evolutionary  
16 analyses of repeated games have focused on the prisoner’s dilemma (9–23), though a few evolutionary analyses have considered  
17 more complex stage games (24, 25). Similarly, most laboratory and field studies of the effects of repeated interaction have also  
18 focused on the prisoner’s dilemma (9, 26–28), though some papers consider variants with an additional third action (29, 30).

19 Reciprocal altruism is an important force in long-term relationships among a relatively small number of players, such as  
20 business partnerships or collusive agreements among firms, but there are many social settings where people manage to cooperate  
21 even though direct reciprocation is impossible. These interactions are better modelled as games with repeated random matching  
22 (31). When the population is small compared to the discount factor, cooperation in the prisoner’s dilemma can be enforced by  
23 contagion equilibria even when players have no information at all about each other’s past actions (32–34). These equilibria do  
24 not exist when the population is large compared to the discount factor, so they are ruled out by our assumption of a continuum  
25 population.

26 Previous research on indirect reciprocity in large populations has studied the enforcement of cooperation as an equilibrium  
27 using first-order information. Takahashi (35) shows that cooperation can be supported as a strict equilibrium when the  
28 PD exhibits strategic complementarity; however, his model does not allow noise or the inflow of new players, and assumes  
29 players can use a commonly known calendar to coordinate their play. Heller and Mohlin (36) show that, under strategic  
30 complementarity, the presence of a small share of players who always defect allows cooperation to be sustained as a stable  
31 (though not necessarily strict) equilibrium when players are infinitely lived and infinitely patient and are restricted to using  
32 stationary strategies. The broader importance of strategic complementarity has long been recognized in economics (37, 38) and  
33 game theory (39, 40).

34 Many papers study the evolutionary selection of cooperation using image scoring (41–52). With image scoring, each player  
35 has first-order information about their partner, but conditions their action only on their partner’s record and not on their  
36 own record. These strategies are never a strict equilibrium, and are typically unstable in environments with noise (47, 53).  
37 With more complex “higher order” record systems such as standing, cooperation can typically be enforced in a wide range of  
38 games (32, 44, 54–62). Most research has focused on the case where each player has only two states: for instance, Ohtsuko and  
39 Iwasa (44, 63) consider all possible record systems of this type, and show that only 8 of them allow an ESS with high levels of  
40 cooperation. Our first-order records can take on any integer values, so they do not fall into this class, even though behavior is  
41 determined by a binary classification of the records. Another innovation in our model is to consider steady-state equilibria in a  
42 model with a constant inflow of new players, even without any evolutionary dynamics. This approach has previously been used  
43 to model industry dynamics in economics (64, 65), but is novel in the context of models of cooperation and repeated games.

44 The key novel aspects of our framework may thus be summarized as follows:

- 45 1. Information (“records”) depends only on a player’s own past actions, but players condition their behavior on their own  
46 record as well as their current partner’s record.
- 47 2. The presence of strategic complementarity implies that such two-sided conditioning can generate strict incentives for  
48 cooperation.
- 49 3. Records are integers, and can therefore remain “good” even if they are repeatedly hit by noise (as is inevitable when  
50 players are long-lived).
- 51 4. The presence of a constant inflow of new players implies that the population share with “good” records can remain  
52 positive even in steady state.

### 53 Model Description

54 Here we formally present the model and the steady-state and equilibrium concepts.

55 Time is discrete and doubly infinite:  $t \in \{\dots, -2, -1, 0, 1, 2, \dots\}$ . There is a unit mass of individuals, each with survival  
56 probability  $\gamma \in (0, 1)$ , and an inflow of  $1 - \gamma$  newborns each period to keep the population size constant.

Every period, individuals randomly match in pairs to play the PD (Fig. 1). Each individual carries a *record*  $k \in \mathbb{N} := \{0, 1, 2, \dots\}$ . Newborns have record 0. When two players meet, they observe each other’s records and nothing else. A *strategy* is a mapping  $\mathbf{s} : \mathbb{N} \times \mathbb{N} \rightarrow \{C, D\}$ . All players use the same strategy. When the players use strategy  $\mathbf{s}$ , the distribution over next-period records of a player with record  $k$  who meets a player with record  $k'$  is given by

$$\phi_{k,k'}(\mathbf{s}) = \begin{cases} r_k(C) \text{ w/ prob. } 1 - \varepsilon, & r_k(D) \text{ w/ prob. } \varepsilon & \text{if } \mathbf{s}(k, k') = C \\ r_k(D) \text{ w/ prob. } 1 & & \text{if } \mathbf{s}(k, k') = \text{Dendequation*} \end{cases},$$

57 where  $r_k(C)$  is the next-period record when a player with current record  $k$  is recorded as playing  $C$  and  $r_k(D)$  is the next-period  
58 record when a player with current record  $k$  is recorded as playing  $D$ . For the Counting  $D$ ’s record system,  $r_k(C) = k$  and  
59  $r_k(D) = k + 1$  for all  $k \in \mathbb{N}$ . More generally, for each  $k \in \mathbb{N}$ ,  $r_k(C)$  and  $r_k(D)$  can be arbitrary integers.

The *state* of the system  $\mu \in \Delta(\mathbb{N})$  describes the share of the population with each record, where  $\mu_k \in [0, 1]$  denotes the share with record  $k$ . The evolution of the state over time under strategy  $\mathbf{s}$  is described by the update map  $f_{\mathbf{s}} : \Delta(\mathbb{N}) \rightarrow \Delta(\mathbb{N})$ , given by

$$f_{\mathbf{s}}(\mu)[0] := 1 - \gamma + \gamma \sum_{k'} \sum_{k''} \mu_{k'} \mu_{k''} \phi_{k',k''}(\mathbf{s})[0],$$

$$f_{\mathbf{s}}(\mu)[k] := \gamma \sum_{k'} \sum_{k''} \mu_{k'} \mu_{k''} \phi_{k',k''}(\mathbf{s})[k] \text{ for } k \neq 0.$$

A *steady state* under strategy  $\mathbf{s}$  is a state  $\mu$  such that  $f_{\mathbf{s}}(\mu) = \mu$ .

Given a strategy  $\mathbf{s}$  and state  $\mu$ , the expected flow payoff of a player with record  $k$  is  $\pi_k(\mathbf{s}, \mu) = \sum_{k'} \mu_{k'} u(\mathbf{s}(k, k'), \mathbf{s}(k', k))$ , where  $u$  is the (normalized) PD payoff function given by

$$u(a_1, a_2) = \begin{cases} 1 & \text{if } (a_1, a_2) = (C, C) \\ -l & \text{if } (a_1, a_2) = (C, D) \\ 1 + g & \text{if } (a_1, a_2) = (D, C) \\ 0 & \text{if } (a_1, a_2) = (D, D) \end{cases}.$$

Denote the probability that a player with current record  $k$  has record  $k'$   $t$  periods in the future by  $\phi_k(\mathbf{s}, \mu)^t(k')$ . The continuation payoff of a player with record  $k$  is then  $V_k(\mathbf{s}, \mu) = (1 - \gamma) \sum_{t=0}^{\infty} \gamma^t \sum_{k'} \phi_k(\mathbf{s}, \mu)^t(k') \pi_{k'}(\mathbf{s}, \mu)$ . A player's objective is to maximize their expected lifetime payoff.

A pair  $(\mathbf{s}, \mu)$  is an *equilibrium* if  $\mu$  is a steady-state under  $\mathbf{s}$  and, for each own record  $k$  and opponent's record  $k'$ ,  $\mathbf{s}(k, k') \in \{C, D\}$  maximizes  $(1 - \gamma)u(a, \mathbf{s}(k', k)) + \gamma \sum_{k''} (\rho(k, a)[k'']) V_{k''}(\mathbf{s}, \mu)$  over  $a \in \{C, D\}$ , where  $\rho(k, a)[k'']$  denotes the probability that a player with record  $k$  who takes action  $a$  acquires next-period record  $k''$ . An equilibrium is *strict* if the maximizer is unique for all pairs  $(k, k')$ .

This equilibrium definition encompasses two forms of strategic robustness. First, we allow agents to maximize over all possible strategies, as opposed to only strategies from some pre-selected set. Second, we focus on strict equilibria, which remain equilibria under “small” perturbations of the model.

## Limit Cooperation under GrimK Strategies

Under *GrimK* strategies, a matched pair of players cooperate if and only if both records are below a pre-specified cutoff  $K$ : that is,  $s(k, k') = C$  if  $\max\{k, k'\} < K$  and  $s(k, k') = D$  if  $\max\{k, k'\} \geq K$ .

We call an individual a *cooperator* if their record is below  $K$  and a *defector* otherwise. Note that each individual may be a cooperator for some periods of their life and a defector for other periods.

Given an equilibrium strategy *GrimK*, let  $\mu^C = \sum_{k=0}^{K-1} \mu_k$  denote the corresponding steady-state share of cooperators. Note that, in a steady state with cooperator share  $\mu^C$ , mutual cooperation is played in share  $(\mu^C)^2$  of all matches. Let  $\bar{\mu}^C(\gamma, \varepsilon)$  be the maximal share of cooperators in any *GrimK* equilibrium (allowing for every possible  $K$ ) when the survival probability is  $\gamma$  and the noise level is  $\varepsilon$ .

The following theorem characterizes the performance of equilibria in *GrimK* strategies in the double limit of interest (33, 35, 44, 63, 66) where the survival probability approaches 1—so that players expect to live a long time and the “shadow of the future” looms large—and the noise level approaches 0—so that players who play  $C$  are unlikely to be recorded as playing  $D$ .

### Theorem 1.

$$\lim_{(\gamma, \varepsilon) \rightarrow (1, 0)} \bar{\mu}_{gr}^C(\gamma, \varepsilon) = \begin{cases} \frac{l}{1+l} & \text{if } g < \frac{l}{1+l} \\ 0 & \text{if } g > \frac{l}{1+l} \end{cases}.$$

To prove the theorem, let  $\beta : (0, 1) \times (0, 1) \times (0, 1) \rightarrow (0, 1)$  be the function given by

$$\beta(\gamma, \varepsilon, \mu^C) = \frac{\gamma(1 - (1 - \varepsilon)\mu^C)}{1 - \gamma(1 - \varepsilon)\mu^C}. \quad [1]$$

When players use *GrimK* strategies and the share of cooperators is  $\mu^C$ ,  $\beta(\gamma, \varepsilon, \mu^C)$  is the probability that a player with cooperator record  $k$  survives to reach record  $k + 1$ . (This probability is the same for all  $k < K$ .)

**Lemma 2.** *There is a GrimK equilibrium with cooperator share  $\mu^C$  if and only if the following conditions hold:*

1. *Feasibility:*

$$\mu^C = 1 - \beta(\gamma, \varepsilon, \mu^C)^K. \quad [2]$$

2. *Incentives:*

$$\frac{(1 - \varepsilon)(1 - \mu^C)}{1 - (1 - \varepsilon)\mu^C} \mu^C > g, \quad [3]$$

$$\mu^C < \frac{1}{\gamma(1 - \varepsilon)} \frac{l}{1 + l}. \quad [4]$$

91 Note that  $\mu^C = 0$  solves [2] when  $K = 0$ . For any  $K > 0$ ,  $0 < 1 - \beta(\gamma, \varepsilon, \mu^C)^K$  and  $1 > 1 - \beta(\gamma, \varepsilon, 1)^K$ , so by the intermediate  
 92 value theorem, [2] has some solution  $\mu \in (0, 1)$ . Thus, there is at least one steady state for every *GrimK* strategy. For some  
 93 strategies, there are multiple steady states, but never more than  $K + 1$ , because [2] can be rewritten as a polynomial equation  
 94 in  $\mu^C$  with degree  $K + 1$ .

95 The upper bounds on the equilibrium share of cooperators in Figure 2 are the suprema of the  $\mu^C \in (0, 1)$  that satisfy [3]  
 96 and [4] for the corresponding  $(\gamma, \varepsilon)$  parameters. When no  $\mu^C \in (0, 1)$  satisfy [3] and [4], the upper bound is 0, since *Grim0*  
 97 (where everyone plays  $D$ ) is always a strict equilibrium.

To see how the  $g > l/(1 + l)$  case of Theorem 1 comes from Lemma 2, note that

$$\frac{(1 - \varepsilon)(1 - \mu^C)}{1 - (1 - \varepsilon)\mu^C} \leq 1.$$

98 Thus, [3] requires  $\mu^C > g$ . Moreover, combining  $\mu^C > g$  with [4] gives  $\gamma(1 - \varepsilon)g < l/(1 + l)$ . Taking the  $(\gamma, \varepsilon) \rightarrow (1, 0)$  limit of  
 99 this inequality gives  $g \leq l/(1 + l)$ . Thus, when  $g > l/(1 + l)$ , it follows that  $\lim_{(\gamma, \varepsilon) \rightarrow (1, 0)} \bar{\mu}^C(\gamma, \varepsilon) = 0$ .

100 All that remains is to show that  $\lim_{(\gamma, \varepsilon) \rightarrow (1, 0)} \bar{\mu}^C(\gamma, \varepsilon) = l/(1 + l)$  when  $g > l/(1 + l)$ . Since  $\lim_{\varepsilon \rightarrow 0} (1 - \varepsilon)(1 - \mu^C)/(1 - (1 - \varepsilon)\mu^C) = 1$  for any fixed  $\mu^C$  and  $\lim_{(\gamma, \varepsilon) \rightarrow (1, 0)} 1/(\gamma(1 - \varepsilon)) = 1$ , it follows that values of  $\mu^C$  smaller than, but arbitrarily close to,  
 101  $l/(1 + l)$  satisfy [3] and [4] in the double limit. Thus, the only difficulty is showing the feasibility of  $\mu^C$  as a steady-state level  
 102 of cooperation: because  $K$  must be an integer, some values of  $\mu^C$  cannot be generated by any  $K$ , for given values of  $\gamma$  and  $\varepsilon$ .  
 103 The following result shows that this “integer problem” becomes irrelevant in the limit. That is, any value of  $\mu^C \in (0, 1)$  can be  
 104 approximated arbitrarily closely by a feasible steady-state share of cooperators for some *GrimK* strategy as  $(\gamma, \varepsilon) \rightarrow (1, 0)$ .  
 105

106 **Lemma 3.** *Fix any  $\mu^C \in (0, 1)$ . For all  $\Delta > 0$ , there exist  $\bar{\gamma} < 1$  and  $\bar{\varepsilon} > 0$  such that, for all  $\gamma > \bar{\gamma}$  and  $\varepsilon < \bar{\varepsilon}$ , there exists  $\hat{\mu}^C$   
 107 that satisfies [2] for some  $K$  such that  $|\hat{\mu}^C - \mu^C| < \Delta$ .*

108 To complete the proof of Theorem 1, we now prove Lemmas 2 and 3.

109 **Proof of Lemma 2.** We first establish the feasibility condition of Lemma 2, and then we establish its incentives condition.

110 The feasibility condition comes from the following lemma.

111 **Lemma 4.** *In a *GrimK* equilibrium with cooperator share  $\mu^C$ ,  $\mu_k = \beta(\gamma, \varepsilon, \mu^C)^k(1 - \beta(\gamma, \varepsilon, \mu^C))$  for all  $k < K$ .*

To see why Lemma 4 implies the feasibility condition of Lemma 2, note that

$$\mu^C = \sum_{k=0}^{K-1} \beta(\gamma, \varepsilon, \mu^C)^k(1 - \beta(\gamma, \varepsilon, \mu^C)) = 1 - \beta(\gamma, \varepsilon, \mu^C)^K.$$

*Proof of Lemma 4.* The inflow into record 0 is  $1 - \gamma$ , while the outflow from record 0 is  $(1 - \gamma(1 - \varepsilon)\mu^C)\mu_0$ . Setting these equal  
 gives

$$\mu_0 = \frac{1 - \gamma}{1 - \gamma(1 - \varepsilon)\mu^C} = 1 - \beta(\gamma, \varepsilon, \mu^C).$$

Additionally, for every  $0 < k < K$ , the inflow into record  $k$  is  $\gamma(1 - (1 - \varepsilon)\mu^C)\mu_{k-1}$ , while the outflow from record  $k$  is  
 $(1 - \gamma(1 - \varepsilon)\mu^C)\mu_k$ . Setting these equal gives

$$\mu_k = \frac{\gamma(1 - (1 - \varepsilon)\mu^C)}{1 - \gamma(1 - \varepsilon)\mu^C} \mu_{k-1} = \beta(\gamma, \varepsilon, \mu^C)\mu_{k-1}.$$

112 Combining this with  $\mu_0 = 1 - \beta(\gamma, \varepsilon, \mu^C)$  gives  $\mu_k = \beta(\gamma, \varepsilon, \mu^C)^k(1 - \beta(\gamma, \varepsilon, \mu^C))$  for  $0 \leq k \leq K - 1$ . ■

113 We now establish the incentive condition of Lemma 2. We will see that the incentive constraint [3] guarantees that a  
 114 record-0 cooperator plays  $C$  against an opponent playing  $C$ , and the incentive constraint [4] guarantees that a record- $(K - 1)$   
 115 cooperator plays  $D$  against an opponent playing  $D$ . Record-0 cooperators are the cooperators most tempted to defect against  
 116 a cooperative opponent and record- $(K - 1)$  cooperators are the cooperators most tempted to cooperate against a defecting  
 117 opponent, so these constraints guarantee the incentives of all cooperators are satisfied.

118 Formally, to establish the incentive condition, we rely on the following lemma.

**Lemma 5.** *In a *GrimK* equilibrium with cooperator share  $\mu^C$ ,*

$$V_k = \begin{cases} (1 - \beta(\gamma, \varepsilon, \mu^C)^{K-k})\mu^C & \text{if } k < K \\ 0 & \text{if } k \geq K. \end{cases}$$

119

To derive the incentive condition of Lemma 2 from Lemma 5, note that the expected continuation payoff of a record-0 player from playing  $C$  is  $(1 - \varepsilon)V_0 + \varepsilon V_1$ , while the expected continuation payoff from playing  $D$  is  $V_1$ . Thus, a record 0 player strictly prefers to play  $C$  against an opponent playing  $C$  iff  $(1 - \varepsilon)\gamma(V_0 - V_1)/(1 - \gamma) > g$ . Combining Lemmas 4 and 5 gives

$$(1 - \varepsilon)\frac{\gamma}{1 - \gamma}(V_0 - V_1) = \frac{1 - \varepsilon}{1 - (1 - \varepsilon)\mu^C}\beta(\gamma, \varepsilon, \mu^C)^K\mu^C = \frac{(1 - \varepsilon)(1 - \mu^C)}{1 - (1 - \varepsilon)\mu^C}\mu^C,$$

so [3] follows. Moreover, the expected continuation payoff of a record  $K - 1$  player from playing  $C$  is  $(1 - \varepsilon)V_{K-1} + \varepsilon V_K$ , while the expected continuation payoff from playing  $D$  is  $V_K$ . Thus, a record  $K - 1$  player strictly prefers to play  $D$  against an opponent playing  $D$  iff  $(1 - \varepsilon)\gamma(V_{K-1} - V_K)/(1 - \gamma) < l$ . Lemma 5 gives

$$(1 - \varepsilon)\frac{\gamma}{1 - \gamma}(V_{K-1} - V_K) = \frac{\gamma(1 - \varepsilon)\mu^C}{1 - \gamma(1 - \varepsilon)\mu^C},$$

and setting this to be less than  $l$  gives [4].

*Proof of Lemma 5.* The flow payoff for any record  $k \geq K$  is 0, so  $V_k = 0$  for  $k \geq K$ . For  $k < K$ ,  $V_k = (1 - \gamma)\mu^C + \gamma(1 - \varepsilon)\mu^C V_k + \gamma(1 - (1 - \varepsilon)\mu^C)V_{k+1}$ , which gives  $V_k = (1 - \beta(\gamma, \varepsilon, \mu^C))\mu^C + \beta(\gamma, \varepsilon, \mu^C)V_{k+1}$ . Combining this with  $V_K = 0$  gives  $V_k = (1 - \beta(\gamma, \varepsilon, \mu^C))^{K-k}\mu^C$  for  $k < K$ . ■

**Proof of Lemma 3.** The proof first establishes some properties of two functions,  $\tilde{K}$  and  $d$ , which we now introduce.

Let  $\tilde{K} : (0, 1) \times (0, 1) \times (0, 1) \rightarrow \mathbb{R}_+$  be the function given by

$$\tilde{K}(\gamma, \varepsilon, \mu^C) = \frac{\ln(1 - \mu^C)}{\ln(\beta(\gamma, \varepsilon, \mu^C))}. \quad [5]$$

By construction,  $\tilde{K}(\gamma, \varepsilon, \mu^C)$  is the unique  $K \in \mathbb{R}_+$  such that  $\mu^C = 1 - \beta(\gamma, \varepsilon, \mu^C)^K$ . Let  $d : (0, 1] \times [0, 1) \times (0, 1) \rightarrow \mathbb{R}$  be the function given by

$$d(\gamma, \varepsilon, \mu^C) = \begin{cases} 1 + \ln(1 - \mu^C)(1 - \mu^C) \frac{\frac{\partial \beta}{\partial \mu^C}(\gamma, \varepsilon, \mu^C)}{\beta(\gamma, \varepsilon, \mu^C) \ln(\beta(\gamma, \varepsilon, \mu^C))} & \text{if } \gamma < 1 \\ 1 + \frac{(1 - \varepsilon) \ln(1 - \mu^C)(1 - \mu^C)}{1 - (1 - \varepsilon)\mu^C} & \text{if } \gamma = 1 \end{cases}.$$

The  $\mu^C$  derivative of  $\tilde{K}(\gamma, \varepsilon, \mu^C)$  is related to  $d(\gamma, \varepsilon, \mu^C)$  by the following lemma.

**Lemma 6.**  $\tilde{K} : (0, 1) \times (0, 1) \times (0, 1) \rightarrow \mathbb{R}_+$  is differentiable in  $\mu^C$  with derivative given by

$$\frac{\partial \tilde{K}}{\partial \mu^C}(\gamma, \varepsilon, \mu^C) = -\frac{d(\gamma, \varepsilon, \mu^C)}{(1 - \mu^C) \ln(\beta(\gamma, \varepsilon, \mu^C))}.$$

*Proof of Lemma 6.* From [5], it follows that  $\tilde{K}(\gamma, \varepsilon, \mu^C)$  is differentiable in  $\mu^C$  with derivative given by

$$\begin{aligned} \frac{\partial \tilde{K}}{\partial \mu^C}(\gamma, \varepsilon, \mu^C) &= -\frac{\frac{\ln(\beta(\gamma, \varepsilon, \mu^C))}{1 - \mu^C} + \frac{\ln(1 - \mu^C) \frac{\partial \beta}{\partial \mu^C}(\gamma, \varepsilon, \mu^C)}{\beta(\gamma, \varepsilon, \mu^C)}}{\ln(\beta(\gamma, \varepsilon, \mu^C))^2} \\ &= -\frac{1 + \ln(1 - \mu^C)(1 - \mu^C) \frac{\frac{\partial \beta}{\partial \mu^C}(\gamma, \varepsilon, \mu^C)}{\beta(\gamma, \varepsilon, \mu^C) \ln(\beta(\gamma, \varepsilon, \mu^C))}}{(1 - \mu^C) \ln(\beta(\gamma, \varepsilon, \mu^C))} \\ &= -\frac{d(\gamma, \varepsilon, \mu^C)}{(1 - \mu^C) \ln(\beta(\gamma, \varepsilon, \mu^C))}. \end{aligned} \quad \blacksquare$$

The following two lemmas concern properties of  $d(\gamma, \varepsilon, \mu^C)$  that will be useful for the proof of Lemma 3.

**Lemma 7.**  $d : (0, 1] \times [0, 1) \times (0, 1) \rightarrow \mathbb{R}$  is well-defined and continuous.

*Proof of Lemma 7.* Since  $\beta(\gamma, \varepsilon, \mu^C)$  is differentiable and only takes values in  $(0, 1)$ , it follows that  $d(\gamma, \varepsilon, \mu^C)$  is well-defined. Moreover, since  $\beta(\gamma, \varepsilon, \mu^C)$  is continuously differentiable for all  $\mu^C \in (0, 1)$ ,  $d(\gamma, \varepsilon, \mu^C)$  is continuous for  $\gamma < 1$ . All that remains is to check that  $d(\gamma, \varepsilon, \mu^C)$  is continuous for  $\gamma = 1$ .

First, note that  $d(1, \varepsilon, \mu^C)$  is continuous in  $(\varepsilon, \mu^C)$ . Thus, we need only check the limit in which  $\gamma$  approaches 1, but never equals 1. Note that

$$\begin{aligned} \frac{\frac{\partial \beta}{\partial \mu^C}(\gamma, \varepsilon, \mu^C)}{\beta(\gamma, \varepsilon, \mu^C) \ln(\beta(\gamma, \varepsilon, \mu^C))} &= -\frac{\frac{\gamma(1 - \varepsilon)(1 - \gamma)}{(1 - \gamma(1 - \varepsilon)\mu^C)^2}}{\beta(\gamma, \varepsilon, \mu^C) \ln(\beta(\gamma, \varepsilon, \mu^C))} \\ &= -\left(\frac{\gamma(1 - \varepsilon)}{\beta(\gamma, \varepsilon, \mu^C)(1 - \gamma(1 - \varepsilon)\mu^C)}\right) \left(\frac{1 - \beta(\gamma, \varepsilon, \mu^C)}{\ln(\beta(\gamma, \varepsilon, \mu^C))}\right). \end{aligned} \quad [6]$$

138 It is clear that

$$139 \lim_{\substack{(\tilde{\gamma}, \tilde{\varepsilon}, \tilde{\mu}^C) \rightarrow (1, \varepsilon, \mu^C) \\ \tilde{\gamma} \neq 1}} \frac{\tilde{\gamma}(1 - \tilde{\varepsilon})}{\beta(\tilde{\gamma}, \tilde{\varepsilon}, \tilde{\mu}^C)(1 - \tilde{\gamma}(1 - \tilde{\varepsilon})\tilde{\mu}^C)} = \frac{1 - \varepsilon}{(1 - (1 - \varepsilon)\mu^C)} \quad [7]$$

for all  $(\varepsilon, \mu^C) \in [0, 1) \times (0, 1)$ . For  $\gamma$  close to 1,

$$\ln(\beta(\gamma, \varepsilon, \mu^C)) = \beta(\gamma, \varepsilon, \mu^C) - 1 + O((\beta(\gamma, \varepsilon, \mu^C) - 1)^2).$$

140 Thus,

$$141 \lim_{\substack{(\tilde{\gamma}, \tilde{\varepsilon}, \tilde{\mu}^C) \rightarrow (1, \varepsilon, \mu^C) \\ \tilde{\gamma} \neq 1}} \frac{1 - \beta(\tilde{\gamma}, \tilde{\varepsilon}, \tilde{\mu}^C)}{\ln(\beta(\tilde{\gamma}, \tilde{\varepsilon}, \tilde{\mu}^C))} = -1 \quad [8]$$

142 for all  $(\varepsilon, \mu^C) \in [0, 1) \times (0, 1)$ . Equations 6, 7, and 8 together imply that  $d(\gamma, \varepsilon, \mu^C)$  is continuous for  $\gamma = 1$ . ■

143 **Lemma 8.**  $d(1, 0, \mu^C)$  has precisely one zero in  $\mu^C \in (0, 1)$ , and the zero is located at  $\mu^C = 1 - 1/e$ .

144 *Proof of Lemma 8.* This follows from the fact that  $d(1, 0, \mu^C) = 1 + \ln(1 - \mu^C)$ . ■

145 With these preliminaries established, we now present the proof of Lemma 3.

146 *Completing the Proof of Lemma 3.* Fix some  $\tilde{\mu}^C \in (0, 1)$  such that  $\tilde{\mu}^C \neq 1 - 1/e$ . Lemma 8 says  $d(1, 0, \tilde{\mu}^C) \neq 0$ . Because of  
147 this and the continuity of  $d$ , there exist some  $\lambda > 0$  and some  $\delta > 0$ ,  $\bar{\gamma}' < 1$ , and  $\bar{\varepsilon} > 0$  such that  $|d(\gamma, \varepsilon, \mu^C)| > \lambda$  for all  $\gamma > \bar{\gamma}'$ ,  
148  $\varepsilon < \bar{\varepsilon}$ , and  $|\mu^C - \tilde{\mu}^C| < \delta$ .

Additionally, note that  $\lim_{\gamma \rightarrow 1} \inf_{(\varepsilon, \mu^C) \in (0, \bar{\varepsilon}) \times (\mu^C - \delta, \mu^C + \delta)} \beta(\gamma, \varepsilon, \mu^C) = 1$ . Together these facts imply that there exists some  $\bar{\gamma} < 1$  such that

$$\left| \frac{\partial \tilde{K}}{\partial \mu^C}(\gamma, \varepsilon, \mu^C) \right| = \left| \frac{d(\gamma, \varepsilon, \mu^C)}{(1 - \mu^C) \ln(\beta(\gamma, \varepsilon, \mu^C))} \right| > \frac{2}{\min\{\delta, \Delta\}}$$

and  $\tilde{K}(\gamma, \varepsilon, \mu^C) \geq 1$  for all  $\gamma > \bar{\gamma}$ ,  $\varepsilon < \bar{\varepsilon}$ , and  $|\mu^C - \tilde{\mu}^C| < \delta$ . It thus follows that

$$\sup_{|\mu^C - \tilde{\mu}^C| \leq \min\{\delta, \Delta\}} |\tilde{K}(\gamma, \varepsilon, \mu^C) - \tilde{K}(\gamma, \varepsilon, \tilde{\mu}^C)| > 1$$

149 for all  $\gamma > \bar{\gamma}$ ,  $\varepsilon < \bar{\varepsilon}$ . Hence, there exists some  $\hat{\mu}^C$  within  $\Delta$  of  $\tilde{\mu}^C$  and some non-negative integer  $\hat{K}$  such that  $\tilde{K}(\gamma, \varepsilon, \hat{\mu}^C) = \hat{K}$ ,  
150 which implies that  $\hat{\mu}^C$  is feasible since  $\hat{\mu}^C = 1 - \beta(\gamma, \varepsilon, \hat{\mu}^C)^{\hat{K}}$ . ■

## 151 Limit Cooperation under Trigger Strategies

152 We characterize the maximum level of cooperation that the class of *trigger strategies* can achieve in the  $(\gamma, \varepsilon) \rightarrow (1, 0)$  limit.  
153 Recall that this is the class of strategies that satisfy the following properties: (i) The set of all possible records can be partitioned  
154 into two classes, “good records”  $G$  and “bad records”  $B$ . (ii) Partners cooperate if and only if they both have good records:  
155  $s(k, k') = C$  for all pairs  $(k, k') \in G \times G$ , and  $s(k, k') = D$  for all other pairs  $(k, k')$ . (iii) The class  $B$  is absorbing: if  $k \in B$ ,  
156 then every record  $k'$  that can be reached starting at record  $k$  is also in  $B$ . As with *GrimK*, let  $\mu^C = \sum_{k \in G} \mu_k$  denote the  
157 steady-state share of cooperators in a trigger strategy equilibrium, and let  $\bar{\mu}^C(\gamma, \varepsilon)$  be the maximal share of cooperators in any  
158 trigger strategy equilibrium when the survival probability is  $\gamma$  and the noise level is  $\varepsilon$ .

**Theorem 9.**

$$\lim_{(\gamma, \varepsilon) \rightarrow (1, 0)} \bar{\mu}^C(\gamma, \varepsilon) = \begin{cases} \frac{l}{1+l} & \text{if } g < \frac{l}{1+l} \\ 0 & \text{if } g > \frac{l}{1+l} \end{cases}.$$

159

160 This result shows that the maximum level of cooperation in the double limit achieved by strategies in the *GrimK* class  
161 equals that of the broader trigger strategy class. Since every *GrimK* strategy is a trigger strategy, the maximum level of  
162 cooperation achieved by trigger strategies weakly exceeds the maximum level achieved by *GrimK* strategies. Thus, it suffices  
163 to show that  $\limsup_{(\gamma, \varepsilon) \rightarrow (1, 0)} \bar{\mu}^C(\gamma, \varepsilon) \leq l/(1+l)$  when  $g < l/(1+l)$  and  $\limsup_{(\gamma, \varepsilon) \rightarrow (1, 0)} \bar{\mu}^C(\gamma, \varepsilon) = 0$  when  $g > l/(1+l)$ .  
164 This is a consequence of the following two lemmas.

165 **Lemma 10.** In any trigger strategy equilibrium,  $\gamma(1 - \varepsilon)\mu^C < l/(1+l)$ .

166 **Lemma 11.** In any trigger strategy equilibrium,  $\mu^C > g$ .

167 To see that Theorem 9 follows from Lemmas 10 and 11, note that  $\gamma(1 - \varepsilon)\mu^C < l/(1+l)$  implies that  $\mu^C \leq l/(1+l)$  in the  
168  $(\gamma, \varepsilon) \rightarrow (1, 0)$  limit. Thus,  $\limsup_{(\gamma, \varepsilon) \rightarrow (1, 0)} \bar{\mu}^C(\gamma, \varepsilon) \leq l/(1+l)$ . Moreover, combining  $\mu^C \leq l/(1+l)$  with  $\mu^C > g$  implies that  
169  $\limsup_{(\gamma, \varepsilon) \rightarrow (1, 0)} \bar{\mu}^C(\gamma, \varepsilon) = 0$  when  $g > l/(1+l)$ .

170 We now present the proofs of Lemma 10 and 11.

171 *Proof of Lemma 10.* Let  $k$  be a cooperator record. It must be that if a player with current record  $k$  is recorded as playing  $C$ ,  
 172 their next period record would also be a cooperator record. Otherwise, the player with record  $k$  would be better-off always  
 173 playing  $D$ .

174 We can use this to obtain a lower bound on the value functions at cooperator records. Let  $\underline{V}^G := \inf_{k \in G} V_k$  be the infimum  
 175 of the value functions at cooperator records. We will show that

$$176 \quad \underline{V}^G \geq \frac{1 - \gamma}{1 - \gamma(1 - \varepsilon)} (\mu^C(1 + l) - l). \quad [9]$$

The reason for this is that it must be suboptimal for a player with a cooperator record  $k$  to play  $C$  against  $D$ , so  $V_k$  must satisfy

$$\begin{aligned} V_k &> (1 - \gamma)(\mu^C(1 + l) - l) + \gamma(1 - \varepsilon)V_{r_k(C)} + \gamma\varepsilon V_{r_k(D)}, \\ &> (1 - \gamma)(\mu^C(1 + l) - l) + \gamma(1 - \varepsilon)V_{r_k(C)}, \end{aligned}$$

where the second inequality follows from the fact that  $V_{k'} \geq 0$  for all  $k' \in \mathbb{N}$ , which implies  $V_{r_k(D)} \geq 0$ . Thus,

$$V_k > (1 - \gamma)(\mu^C(1 + l) - l) + \gamma(1 - \varepsilon)\underline{V}^G$$

for all cooperator records  $r \in G$ , which likewise implies

$$\underline{V}^G \geq (1 - \gamma)(\mu^C(1 + l) - l) + \gamma(1 - \varepsilon)\underline{V}^G.$$

Solving this for  $\underline{V}^G$  gives

$$\underline{V}^G \geq \frac{1 - \gamma}{1 - \gamma(1 - \varepsilon)} (\mu^C(1 + l) - l),$$

177 so we conclude that the expression in [9] does indeed give a lower bound for  $\underline{V}^G$ .

Let  $k'$  be a cooperator record at which a player will transition to defector status if they are recorded as playing  $D$ . There must be such a record in any equilibrium with cooperation, as otherwise every player would always play  $D$ . A necessary condition for record  $k'$  players to prefer to rather play  $D$  rather than  $C$  against  $D$  is

$$-(1 - \gamma)l + \gamma(1 - \varepsilon)V_{r_{k'}(C)} < 0.$$

Since  $V_{r_{k'}(C)} \geq \underline{V}^G$ , it follows that

$$-(1 - \gamma)l + \gamma(1 - \varepsilon)\underline{V}^G < 0,$$

which by [9] implies

$$-(1 - \gamma)l + \gamma(1 - \varepsilon)\frac{1 - \gamma}{1 - \gamma(1 - \varepsilon)} (\mu^C(1 + l) - l) < 0.$$

Solving this inequality gives

$$\gamma(1 - \varepsilon)\mu^C < \frac{\ell}{1 + \ell}.$$

178

■

179 *Proof of Lemma 11.* For any cooperator record  $k$ , we have

$$180 \quad V_k = (1 - \gamma)\mu^C + \gamma(1 - \varepsilon)\mu^C V_{r_k(C)} + \gamma(1 - (1 - \varepsilon)\mu^C)V_{r_k(D)}. \quad [10]$$

181 The condition for a record  $k$  preciprocator to prefer playing  $C$  rather than  $D$  against  $C$  is

$$182 \quad (1 - \varepsilon)\gamma(V_{r_k(C)} - V_{r_k(D)}) > (1 - \gamma)g. \quad [11]$$

183 Combining [10] and [11] gives

$$184 \quad \frac{1 - \varepsilon}{1 - (1 - \varepsilon)\mu^C} \left( \mu^C - V_r - \frac{\gamma}{1 - \gamma}(V_k - V_{r_k(C)}) \right) > g. \quad [12]$$

185 Let  $\bar{V}^G := \sup_{k \in G} V_k$  be the supremum of the value functions at cooperator records. Since [12] holds for all cooperator  
 186 records  $k \in G$  and  $V_{r_k(C)} \leq \bar{V}^G$ , we have

$$187 \quad \frac{1 - \varepsilon}{1 - (1 - \varepsilon)\mu^C} \left( \mu^C - \bar{V}^G \right) \geq g. \quad [13]$$

The expected lifetime payoff of a newborn player is  $V_0 = (\mu^C)^2$ , so  $\bar{V}^G \geq (\mu^C)^2$ . Combining this with [13] gives

$$\frac{(1 - \varepsilon)(1 - \mu^C)}{1 - (1 - \varepsilon)\mu^C} \mu^C \geq g,$$

188 which implies  $\mu^C > g$ , since  $(1 - \varepsilon)(1 - \mu^C)/(1 - (1 - \varepsilon)\mu^C) < 1$ . ■

## 189 Convergence of *GrimK* Strategies

190 We now derive a key stability property of *GrimK* strategies. Fix an arbitrary initial record distribution  $\mu^0 \in \Delta(\mathbb{N})$ . When all  
191 individuals use *GrimK* strategies, the population share with record  $k$  at time  $t$ ,  $\mu_k^t$ , evolves according to

$$192 \begin{aligned} \mu_0^{t+1} &= 1 - \gamma + \gamma(1 - \varepsilon)\mu^{C,t}\mu_0^t, \\ \mu_k^{t+1} &= \gamma(1 - (1 - \varepsilon)\mu^{C,t})\mu_{k-1}^t + \gamma(1 - \varepsilon)\mu^{C,t}\mu_k^t \text{ for } 0 < k < K, \end{aligned} \quad [14]$$

193 where  $\mu^{C,t} = \sum_{k=0}^{K-1} \mu_k^t$ .

194 Fixing  $K$ , we say that distribution  $\mu$  *dominates* (or is *more favorable than*) distribution  $\tilde{\mu}$  if, for every  $k < K$ ,  $\sum_{\bar{k}=0}^k \mu_{\bar{k}} \geq$   
195  $\sum_{\bar{k}=0}^k \tilde{\mu}_{\bar{k}}$ ; that is, if for every  $k < K$  the share of the population with record no worse than  $k$  is greater under distribution  $\mu$   
196 than under distribution  $\tilde{\mu}$ . Under the *GrimK* strategy, let  $\bar{\mu}$  denote the steady state with the largest share of cooperators, and  
197 let  $\underline{\mu}$  denote the steady state with the smallest share of cooperators.

### 198 Theorem 12.

- 199 1. If  $\mu^0$  dominates  $\bar{\mu}$ , then  $\lim_{t \rightarrow \infty} \mu^t = \bar{\mu}$ .  
200 2. If  $\mu^0$  is dominated by  $\underline{\mu}$ , then  $\lim_{t \rightarrow \infty} \mu^t = \underline{\mu}$ .

201 Let  $x_k = \sum_{\bar{k}=0}^k \mu_{\bar{k}}^t$  denote the share of the population with record no worse than  $k$ . From Equation 14, it follows that

$$202 \begin{aligned} x_0^{t+1} &= 1 - \gamma + \gamma(1 - \varepsilon)x_{K-1}^t x_0^t, \\ x_k^{t+1} &= 1 - \gamma + \gamma x_{k-1}^t + \gamma(1 - \varepsilon)x_{K-1}^t(x_k^t - x_{k-1}^t) \text{ for } 0 < k < K. \end{aligned} \quad [15]$$

To see this, note that  $x_0 = \mu_0$  and  $x_{K-1} = \mu^{C,t}$ , so rewriting the first line in Equation 14 gives the first line in Equation 15.  
Additionally, for  $0 < k < K$ , Equation 14 gives

$$\begin{aligned} x_k^{t+1} &= \sum_{\bar{k} \leq k} \mu_{\bar{k}}^{t+1} = 1 - \gamma + \gamma \sum_{\bar{k} \leq k-1} \mu_{\bar{k}-1}^t + \gamma(1 - \varepsilon)\mu^{C,t}\mu_k^t, \\ &= 1 - \gamma + \gamma x_{k-1}^t + \gamma(1 - \varepsilon)x_{K-1}^t(x_k^t - x_{k-1}^t). \end{aligned}$$

203 **Lemma 13.** *The update map in Equation 15 is weakly increasing: If  $(x_0^t, \dots, x_{K-1}^t) \geq (\tilde{x}_0^t, \dots, \tilde{x}_{K-1}^t)$ , then  $(x_0^{t+1}, \dots, x_{K-1}^{t+1}) \geq$   
204  $(\tilde{x}_0^{t+1}, \dots, \tilde{x}_{K-1}^{t+1})$ .*

205 *Proof of Lemma 13.* The right-hand side of the first line in Equation 15 depends only on the product of  $x_0^t$  and  $x_{K-1}^t$ , and it is  
206 strictly increasing in this product. The right-hand side of the second line in Equation 15 depends only on  $x_{k-1}^t$ ,  $x_k^t$ , and  $x_{K-1}^t$ ,  
207 and, holding fixed any two of these variables, it is weakly increasing in the third variable. ■

208 *Proof of Theorem 12.* We prove the first statement of Theorem 12. A similar argument handles the second statement. Let  
209  $(\tilde{x}_0^t, \dots, \tilde{x}_{K-1}^t)$  denote the time-path corresponding to the highest possible initial conditions, i.e.  $(\tilde{x}_0^0, \dots, \tilde{x}_{K-1}^0) = (1, \dots, 1)$ . By  
210 Lemma 13,  $(\tilde{x}_0^{t+1}, \dots, \tilde{x}_{K-1}^{t+1}) \leq (\tilde{x}_0^t, \dots, \tilde{x}_{K-1}^t)$  for all  $t$ . Thus, it follows that  $\lim_{t \rightarrow \infty} (\tilde{x}_0^t, \dots, \tilde{x}_{K-1}^t) = \inf_t (\tilde{x}_0^t, \dots, \tilde{x}_{K-1}^t)$ , so in  
211 particular  $\lim_{t \rightarrow \infty} (\tilde{x}_0^t, \dots, \tilde{x}_{K-1}^t)$  exists. Since the update rules in Equation 15 are continuous, it follows that  $\lim_{t \rightarrow \infty} (\tilde{x}_0^t, \dots, \tilde{x}_{K-1}^t)$   
212 must be a steady state of the system. By Lemma 13 and the fact that  $(\bar{x}_0, \dots, \bar{x}_{K-1})$  is the steady state with the highest share  
213 of cooperators, it follows that  $\lim_{t \rightarrow \infty} (\tilde{x}_0^t, \dots, \tilde{x}_{K-1}^t) = (\bar{x}_0, \dots, \bar{x}_{K-1})$ .

Now, fix some  $(x_0^0, \dots, x_{K-1}^0) \geq (\bar{x}_0, \dots, \bar{x}_{K-1})$ . By Lemma 13,

$$(\bar{x}_0, \dots, \bar{x}_{K-1}) \leq (x_0^t, \dots, x_{K-1}^t) \leq (\tilde{x}_0^t, \dots, \tilde{x}_{K-1}^t)$$

214 for all  $t$ , so it follows that  $\lim_{t \rightarrow \infty} (x_0^t, \dots, x_{K-1}^t) = (\bar{x}_0, \dots, \bar{x}_{K-1})$ . ■

## 215 Evolutionary Analysis

216 We have so far analyzed the efficiency of *GrimK* equilibrium steady states (Theorem 1) and convergence to such steady states  
217 when all players use the *GrimK* strategy (Theorem 12). To further examine the robustness of *GrimK* strategies, we now  
218 perform two types of evolutionary analysis. In the next subsection, we show that, when  $g < l/(1+l)$ , there are sequences of  
219 *GrimK* equilibria that obtain the maximum cooperator share of  $l/(1+l)$  as  $(\gamma, \varepsilon) \rightarrow (1, 0)$  that are robust to invasion by a  
220 small mass of mutants who follow any other *GrimK'* strategy, such as *Always Defect* (i.e., *Grim0*). In the following subsection,  
221 we report simulations of the evolutionary dynamic when a *GrimK* steady state is invaded by mutants playing another *GrimK'*  
222 strategy.



223 **Steady-State Robustness.** We consider the following notion of steady-state robustness.

224 **Definition 1.** A *GrimK* equilibrium with share of cooperators  $\mu^C$  is **steady-state robust to mutants** if, for every  $K' \neq K$   
 225 and  $\alpha > 0$ , there exists some  $\bar{\delta} > 0$  such that when the share of players playing *GrimK* is  $1 - \delta$  and the share of players playing  
 226 *GrimK'* is  $\delta$  with  $\delta < \bar{\delta}$ , then

- 227 • There is a steady state where the fraction of players playing *GrimK* that are cooperators,  $\tilde{\mu}^C$ , satisfies  $|\tilde{\mu}^C - \mu^C| < \alpha$ ,  
 228 and
- 229 • It is strictly optimal to play *GrimK*.

230 We show that, whenever strategic complementarities are strong enough to support a cooperative *GrimK* equilibrium, there  
 231 is a sequence of *GrimK* equilibria that are robust to mutants and attains the maximum cooperation level of  $l/(1+l)$  when  
 232 expected lifespans are long and noise is small.

233 **Theorem 14.** Suppose that  $g < l/(1+l)$ . There is a family of *GrimK* equilibria giving a share of cooperators  $\mu^C(\gamma, \varepsilon)$  for  
 234 parameters  $\gamma, \varepsilon$  such that:

- 235 1.  $\lim_{(\gamma, \varepsilon) \rightarrow (1, 0)} \mu^C(\gamma, \varepsilon) = l/(1+l)$ , and
- 236 2. There is some  $\bar{\gamma} < 1$  and  $\bar{\varepsilon} > 0$  such that, when  $\gamma > \bar{\gamma}$  and  $\varepsilon < \bar{\varepsilon}$ , the *GrimK* equilibrium with share of cooperators  
 237  $\bar{\mu}^C(\gamma, \varepsilon)$  is steady-state robust to mutants.

238 *Proof.* We assume that  $K' < K$ ; the proof for  $K' > K$  is analogous. Fix some  $g < \tilde{\mu}^C < l/(1+l)$  satisfying  $\tilde{\mu}^C \neq 1 - 1/e$ . By  
 239 Lemmas 2 and 3, we know that there exists some family of *GrimK* equilibria with share of cooperators  $\tilde{\mu}^C(\gamma, \varepsilon)$  such that  
 240  $\lim_{(\gamma, \varepsilon) \rightarrow (1, 0)} \tilde{\mu}^C(\gamma, \varepsilon) = \tilde{\mu}^C$ . Fix some  $\gamma, \varepsilon$ , and consider the modified environment where share  $1 - \delta$  of the players use the  
 241 *GrimK* strategy corresponding to  $\tilde{\mu}^C(\gamma, \varepsilon)$  and share  $\delta$  of the players use some other *GrimK'*.

242 Let  $\mu_K^K$  denote the share of the players playing *GrimK* that have record less than  $K$ , let  $\mu_{K'}^K$  be the share of *GrimK* players  
 243 with record less than  $K'$ , and let  $\mu_{K'}^{K'}$  be the share of the players playing *GrimK'* that have record less than  $K'$ . Then in an  
 244 steady state we have

$$\begin{aligned}\mu_K^K &= 1 - \beta(\gamma, \varepsilon, (1 - \delta)\mu_K^K + \delta\mu_{K'}^{K'})^K, \\ \mu_{K'}^K &= 1 - \beta(\gamma, \varepsilon, (1 - \delta)\mu_K^K + \delta\mu_{K'}^{K'})^{K'}, \\ \mu_K^{K'} &= 1 - \gamma^{K-K'} \beta(\gamma, \varepsilon, (1 - \delta)\mu_{K'}^K + \delta\mu_{K'}^{K'})^{K'}, \\ \mu_{K'}^{K'} &= 1 - \beta(\gamma, \varepsilon, (1 - \delta)\mu_{K'}^K + \delta\mu_{K'}^{K'})^{K'}.\end{aligned}$$

245 This can be rewritten as

$$\begin{aligned}f_K^K(\gamma, \varepsilon, \mu_K^K, \mu_{K'}^K, \mu_K^{K'}, \mu_{K'}^{K'}) &:= \mu_K^K + \beta(\gamma, \varepsilon, (1 - \delta)\mu_K^K + \delta\mu_{K'}^{K'})^K - 1 = 0, \\ f_{K'}^K(\gamma, \varepsilon, \mu_K^K, \mu_{K'}^K, \mu_K^{K'}, \mu_{K'}^{K'}) &:= \mu_{K'}^K + \beta(\gamma, \varepsilon, (1 - \delta)\mu_K^K + \delta\mu_{K'}^{K'})^{K'} - 1 = 0, \\ f_K^{K'}(\gamma, \varepsilon, \mu_K^K, \mu_{K'}^K, \mu_K^{K'}, \mu_{K'}^{K'}) &:= \mu_K^{K'} + \gamma^{K-K'} \beta(\gamma, \varepsilon, (1 - \delta)\mu_{K'}^K + \delta\mu_{K'}^{K'})^{K'} - 1 = 0, \\ f_{K'}^{K'}(\gamma, \varepsilon, \mu_K^K, \mu_{K'}^K, \mu_K^{K'}, \mu_{K'}^{K'}) &:= \mu_{K'}^{K'} + \beta(\gamma, \varepsilon, (1 - \delta)\mu_{K'}^K + \delta\mu_{K'}^{K'})^{K'} - 1 = 0.\end{aligned}\tag{16}$$

247 Note that  $\mu_K^K = \tilde{\mu}^C(\gamma, \varepsilon)$ ,  $\mu_{K'}^K = 1 - \beta(\gamma, \varepsilon, \tilde{\mu}^C(\gamma, \varepsilon))^{K'}$ ,  $\mu_K^{K'} = 1 - \gamma^{K-K'} \beta(\gamma, \varepsilon, 1 - \beta(\gamma, \varepsilon, \tilde{\mu}^C(\gamma, \varepsilon))^{K'})^{K'}$ ,  $\mu_{K'}^{K'} =$   
 248  $1 - \beta(\gamma, \varepsilon, 1 - \beta(\gamma, \varepsilon, \tilde{\mu}^C(\gamma, \varepsilon))^{K'})^{K'}$  solves [16] when  $\delta = 0$ . The partial derivatives of the left-hand side of [16] evaluated at  
 249 this point are given by

$$\begin{aligned}&\begin{bmatrix} \frac{\partial f_K^K}{\partial \mu_K^K} & \frac{\partial f_K^K}{\partial \mu_{K'}^K} & \frac{\partial f_K^K}{\partial \mu_K^{K'}} & \frac{\partial f_K^K}{\partial \mu_{K'}^{K'}} \\ \frac{\partial f_{K'}^K}{\partial \mu_K^K} & \frac{\partial f_{K'}^K}{\partial \mu_{K'}^K} & \frac{\partial f_{K'}^K}{\partial \mu_K^{K'}} & \frac{\partial f_{K'}^K}{\partial \mu_{K'}^{K'}} \\ \frac{\partial f_K^{K'}}{\partial \mu_K^K} & \frac{\partial f_K^{K'}}{\partial \mu_{K'}^K} & \frac{\partial f_K^{K'}}{\partial \mu_K^{K'}} & \frac{\partial f_K^{K'}}{\partial \mu_{K'}^{K'}} \\ \frac{\partial f_{K'}^{K'}}{\partial \mu_K^K} & \frac{\partial f_{K'}^{K'}}{\partial \mu_{K'}^K} & \frac{\partial f_{K'}^{K'}}{\partial \mu_K^{K'}} & \frac{\partial f_{K'}^{K'}}{\partial \mu_{K'}^{K'}} \end{bmatrix} \\ &= \begin{bmatrix} 1 + K\beta^{K-1} \frac{\partial \beta}{\partial \mu^C} & 0 & 0 & 0 \\ K'\beta^{K'-1} \frac{\partial \beta}{\partial \mu^C} & 1 & 0 & 0 \\ 0 & \gamma^{K-K'} K'\beta^{K'-1} \frac{\partial \beta}{\partial \mu^C} & 1 & 0 \\ 0 & K'\beta^{K'-1} \frac{\partial \beta}{\partial \mu^C} & 0 & 1 \end{bmatrix}.\end{aligned}\tag{17}$$

Because  $\tilde{\mu}^C(\gamma, \varepsilon) = 1 - \beta(\gamma, \varepsilon, \mu^C(\gamma, \varepsilon))^K$  and  $K = \ln(1 - \tilde{\mu}^C(\gamma, \varepsilon)) / \ln(\beta(\gamma, \varepsilon, \tilde{\mu}^C(\gamma, \varepsilon)))$ ,

$$\begin{aligned} & 1 + K\beta(\gamma, \varepsilon, \tilde{\mu}^C(\gamma, \varepsilon))^{K-1} \frac{\partial \beta}{\partial \mu^C}(\gamma, \varepsilon, \tilde{\mu}^C(\gamma, \varepsilon)) \\ &= 1 + \ln(1 - \tilde{\mu}^C(\gamma, \varepsilon))(1 - \tilde{\mu}^C(\gamma, \varepsilon)) \frac{\frac{\partial \beta}{\partial \mu^C}(\gamma, \varepsilon, \tilde{\mu}^C(\gamma, \varepsilon))}{\beta(\gamma, \varepsilon, \tilde{\mu}^C(\gamma, \varepsilon)) \ln(\beta(\gamma, \varepsilon, \tilde{\mu}^C(\gamma, \varepsilon)))}. \end{aligned}$$

Recall that

$$\beta(\gamma, \varepsilon, \mu^C) = \frac{\gamma(1 - (1 - \varepsilon)\mu^C)}{1 - \gamma(1 - \varepsilon)\mu^C} = 1 - \frac{1 - \gamma}{1 - \gamma(1 - \varepsilon)\mu^C}.$$

Thus,  $\lim_{(\gamma, \varepsilon) \rightarrow (1, 0)} \beta(\gamma, \varepsilon, \tilde{\mu}^C(\gamma, \varepsilon)) = 1$ . Hence, it follows that for high  $\gamma$  and small  $\varepsilon$ ,  $\ln(\beta(\gamma, \varepsilon, \tilde{\mu}^C(\gamma, \varepsilon))) = -(1 - \beta(\gamma, \varepsilon, \tilde{\mu}^C(\gamma, \varepsilon))) + O(1 - \beta(\gamma, \varepsilon, \tilde{\mu}^C(\gamma, \varepsilon)))^2$ . Moreover,

$$\begin{aligned} \frac{\partial \beta}{\partial \mu^C}(\gamma, \varepsilon, \tilde{\mu}^C(\gamma, \varepsilon)) &= -\frac{(1 - \gamma)\gamma(1 - \varepsilon)}{(1 - \gamma(1 - \varepsilon)\mu^C(\gamma, \varepsilon))^2} \\ &= -\frac{\gamma(1 - \varepsilon)}{1 - \gamma(1 - \varepsilon)\tilde{\mu}^C(\gamma, \varepsilon)}(1 - \beta(\gamma, \varepsilon, \tilde{\mu}^C(\gamma, \varepsilon))). \end{aligned}$$

Combining these results gives us

$$\lim_{(\gamma, \varepsilon) \rightarrow (1, 0)} \frac{\frac{\partial \beta}{\partial \mu^C}(\gamma, \varepsilon, \tilde{\mu}^C(\gamma, \varepsilon))}{\beta(\gamma, \varepsilon, \tilde{\mu}^C(\gamma, \varepsilon)) \ln(\beta(\gamma, \varepsilon, \tilde{\mu}^C(\gamma, \varepsilon)))} = \frac{1}{1 - \tilde{\mu}^C}.$$

Since  $\lim_{(\gamma, \varepsilon) \rightarrow (1, 0)} \ln(1 - \tilde{\mu}^C(\gamma, \varepsilon))(1 - \tilde{\mu}^C(\gamma, \varepsilon)) = \ln(1 - \tilde{\mu}^C)(1 - \tilde{\mu}^C)$ , it further follows that

$$\lim_{(\gamma, \varepsilon) \rightarrow (1, 0)} 1 + K\beta(\gamma, \varepsilon, \tilde{\mu}^C(\gamma, \varepsilon))^{K-1} \frac{\partial \beta}{\partial \mu^C}(\gamma, \varepsilon, \tilde{\mu}^C(\gamma, \varepsilon)) = 1 + \ln(1 - \tilde{\mu}^C). \quad [18]$$

Since  $\tilde{\mu} \neq 1 - 1/e$ , we have  $1 + \ln(1 - \tilde{\mu}) \neq 0$ . Thus, using [18], we conclude that the determinant of the matrix of partial derivatives in [17] is non-zero, and so can appeal to the implicit function theorem to conclude that for sufficiently high  $\gamma$  and small  $\varepsilon$ , for each  $K' \neq K$  and  $\alpha > 0$ , there is some  $\delta_1 > 0$  such that when the share of players playing *GrimK* is  $1 - \delta$  and the share of players playing *GrimK'* is  $\delta$  with  $\delta < \delta_1$ , there is a steady state where the fraction of players using *GrimK* that are cooperators,  $\mu^{C'}$ , is such that  $|\mu^{C'} - \tilde{\mu}^C(\gamma, \varepsilon)| < \alpha$ . Additionally, because the *GrimK* equilibrium with share of cooperators  $\tilde{\mu}^C(\gamma, \varepsilon)$  is a strict equilibrium where players have uniformly strict incentives to play according to *GrimK* at every own record and partner record, it follows that there is some  $0 < \bar{\delta} < \delta_1$  such that, when the share of players playing *GrimK* is  $1 - \delta$  and the share of players playing *GrimK'* is  $\delta$  with  $\delta < \bar{\delta}$ , there is a steady state with share of cooperators  $\mu^{C'}$  such that  $|\mu^{C'} - \tilde{\mu}^C(\gamma, \varepsilon)| < \alpha$  where it is strictly optimal to play *GrimK*. ■

**Dynamics.** We performed a simulation to capture dynamic evolution. We considered a population initially playing the *Grim5* equilibrium with steady-state share of cooperators of  $\mu^C \approx 0.8998$  when  $\gamma = 0.9, \varepsilon = 0.1, g = 0.4, l = 2.8$  that is infected with a mutant population playing *Grim1* at  $t = 0$ . The initial share of the population that played *Grim5* was .95, and the complementary share of 0.05 played *Grim1*. At  $t = 0$ , all of the *Grim1* mutants had record 0, while the record shares of the *Grim5* population were proportional to those in the original steady state. At period  $t$ , the players match, observe each others' records (but not what population their opponent belongs to), and then play as their strategy dictates. We denote the average payoff of the *Grim5* players and *Grim1* players at period  $t$  by  $\pi^{Grim5, t}$  and  $\pi^{Grim1, t}$ , respectively.

The evolution of the system from period  $t - 1$  to  $t$  was driven by the average payoffs and sizes of the two populations at  $t - 1$ . In particular, at any period  $t > 0$ , the share of the newborn players that belonged to the *Grim5* population ( $\mu^{NGrim5, t}$ ) was proportional to the product of  $\mu^{Grim5, t-1}$  and  $\pi^{Grim5, t-1}$ , and similarly the share of the  $1 - \gamma$  newborn players that belonged to the *Grim1* population ( $\mu^{NGrim1, t}$ ) was proportional to the product of  $\mu^{Grim1, t-1}$  and  $\pi^{Grim1, t-1}$ . Formally,

$$\begin{aligned} \mu^{NGrim5, t} &= \frac{\mu^{Grim5, t-1} \pi^{Grim5, t-1}}{\mu^{Grim5, t-1} \pi^{Grim5, t-1} + \mu^{Grim1, t-1} \pi^{Grim1, t-1}} (1 - \gamma) \\ \mu^{NGrim1, t} &= \frac{\mu^{Grim1, t-1} \pi^{Grim1, t-1}}{\mu^{Grim5, t-1} \pi^{Grim5, t-1} + \mu^{Grim1, t-1} \pi^{Grim1, t-1}} (1 - \gamma). \end{aligned}$$

**Fig. S1** presents the results of this simulation. **Fig. S1a** depicts the evolution of the share of players that use *Grim5* and are cooperators (i.e. have record  $k < 5$ ). Initially, this share is below the steady-state value of  $\approx 0.8998$ , and is decreasing as the *Grim1* mutants obtain high payoffs relative to the normal *Grim5* players on average. However, the share of cooperator *Grim5* players eventually begins to increase and approaches its steady-state value as the mutants die out.

The reason the mutants eventually die out is that their payoffs eventually decline, as depicted in **Fig. S1b**. The tendency of the *Grim1* players to defect means that they tend to move to high records relatively quickly, and so while they initially receive a high payoff from defecting against cooperators, this advantage is short lived.

277 We found similar results when the mutant population plays *Grim9* rather than *Grim1*, although the average payoff in the  
 278 mutant population never exceeded that in the normal population. And we again found similar results when a population initially  
 279 playing the *Grim8* equilibrium with steady-state share of cooperators of  $\mu^C \approx 0.613315$  and  $\gamma = 0.95, \varepsilon = 0.05, g = 0.5, l = 4$   
 280 is infected with a mutant population playing *Grim3* at  $t = 0$ , and for when it is infected with a mutant population playing  
 281 *Grim13*.

## 282 Public Goods

283 Our analysis so far has taken the basic unit of social interaction to be the standard 2-player prisoner's dilemma. However, there  
 284 are important social interactions that involve many players: the management of the commons and other public resources is a  
 285 leading example (67–70). Such multiplayer public goods games have been the subject of extensive theoretical and experimental  
 286 research (48, 71–75). Here we show that a simple variant of *GrimK* strategies can support positive robust cooperation in the  
 287 multiplayer public goods game when there is sufficient strategic complementarity.

288 We use the same model as considered so far, except that now in each period the players randomly match in groups of size  $n$ ,  
 289 for some fixed integer  $n \geq 2$ . All players in each group simultaneously decide whether to *Contribute* ( $C$ ) or *Not Contribute* ( $D$ ).  
 290 If exactly  $x$  of the  $n$  players in the group contribute, each group member receives a benefit of  $f(x) \geq 0$ , where  $f : \mathbb{N} \rightarrow \mathbb{R}_+$   
 291 is a strictly increasing function with  $f(0) = 0$ . In addition, each player who contributes incurs a private cost of  $c > 0$ . This  
 292 coincides with the 2-player PD when  $n = 2, f(1) = 1 + g, f(2) = l + 2 + g$ , and  $c = l + 1 + g$ .

293 For each  $x \in \{0, \dots, n-1\}$ , let  $\Delta(x) = f(x+1) - f(x)$  denote the marginal benefit to each member when there is an  
 294 additional contribution. Assume that  $\Delta(x) < c < n\Delta(x)$  for each  $x \in \{0, \dots, n-1\}$ . This assumption makes the public good  
 295 game an  $n$ -player PD, in that  $D$  is the selfishly optimal action while everyone playing  $C$  is socially optimal.

296 We consider the same record system as in the 2-player PD: Newborns have record 0. If a player plays  $D$ , their record  
 297 increases by 1. If a player plays  $C$ , their record increases by 1 with probability  $\varepsilon > 0$ , and remains constant with probability  
 298  $1 - \varepsilon$ .

299 As in the 2-player PD, we find that a key determinant of the prospects for robust cooperation is the degree of strategic  
 300 complementarity or substitutability in the social dilemma. In the public good game, we say that the interaction exhibits  
 301 *strategic complementarity* if  $\Delta(x)$  is increasing in  $x$  (i.e., contributing is more valuable when more partners contribute), and  
 302 exhibits *strategic substitutability* if  $\Delta(x)$  is decreasing in  $x$ .

303 We first show that with strategic substitutability the unique strict equilibrium is *Never Contribute*. This generalizes our  
 304 finding that *Always Defect* is the unique strict equilibrium in the 2-player PD when  $g \geq l$ .

305 **Theorem 15.** *For any  $n \geq 2$ , if the public good game exhibits strategic substitutability, the unique strict equilibrium is Never*  
 306 *Contribute.*

307 *Proof.* Suppose  $n$  players who all have the same record  $k$  meet. By symmetry, either they all contribute or none of them  
 308 contribute. In the former case, contributing is optimal for a record- $k$  player when all partners contribute, so by strategic  
 309 substitutability contributing is also optimal for a record- $k$  player when a smaller number of partners contribute. Thus, a  
 310 record- $k$  player contributes regardless of their partners' records. In the latter case, not contributing is optimal for a record- $k$   
 311 player when no partners contribute, so by strategic substitutability not contributing is also optimal for a record- $k$  player when  
 312 a larger number of partners contribute.

313 We have established that, for each  $k$ , record- $k$  players do not condition their behavior on their opponents' records. Hence,  
 314 the distribution of future opposing actions faced by any player is independent of their record. This implies that not contributing  
 315 is always optimal. ■

316 We now turn to the case of strategic complementarity and consider the following simple generalization of *GrimK* strategies:  
 317 Records  $k < K$  are considered to be “good,” while records  $k \geq K$  are considered “bad.” When  $n$  players meet, they all  
 318 contribute if all of their records are good; otherwise, none of them contribute.

319 For *GrimK* strategies to form an equilibrium, two incentive constraints must be satisfied: First, a player with record 0 (the  
 320 “safest” good record) must want to contribute in a group with  $n - 1$  other good-record players. Second, a player with record  
 321  $K - 1$  (the “most fragile” good record) must not want to contribute in a group where no one else contributes.

We let  $g = c - \Delta(n - 1)$  and  $l = c - \Delta(0)$ . Note that

$$V_0 = (1 - \gamma)(\mu^C)^{n-1}(f(n) - c) + \gamma(1 - \varepsilon)(\mu^C)^{n-1}V_0 + \gamma(1 - (1 - \varepsilon)(\mu^C)^{n-1})V_1,$$

which gives

$$(1 - \varepsilon)\frac{\gamma}{1 - \gamma}(V_0 - V_1) = \frac{1 - \varepsilon}{1 - (1 - \varepsilon)(\mu^C)^{n-1}}((\mu^C)^{n-1}(f(n) - c) - V_0).$$

322 By a similar argument to Lemma 5, it can be established that  $V_0 = \mu^C(\mu^C)^{n-1}(f(n) - c)$ . We thus find that the cooperation  
 323 constraint for a record 0 player is

$$\frac{1 - \varepsilon}{1 - (1 - \varepsilon)(\mu^C)^{n-1}}(1 - \mu^C)(\mu^C)^{n-1}(f(n) - c) > g. \quad [19]$$

In addition,

$$V_{K-1} = (1 - \gamma)(\mu^C)^{n-1}(f(n) - c) + \gamma(1 - \varepsilon)(\mu^C)^{n-1}V_{K-1}$$

gives

$$(1 - \varepsilon) \frac{\gamma}{1 - \gamma} V_{K-1} = \frac{\gamma(1 - \varepsilon)}{1 - \gamma(1 - \varepsilon)(\mu^C)^{n-1}} (\mu^C)^{n-1} (f(n) - c).$$

Thus, the defection constraint for a record  $K - 1$  player is

$$\frac{\gamma(1 - \varepsilon)}{1 - \gamma(1 - \varepsilon)(\mu^C)^{n-1}} (\mu^C)^{n-1} (f(n) - c) < l,$$

325 which gives

$$326 (\mu^C)^{n-1} < \frac{1}{\gamma(1 - \varepsilon)} \frac{l}{f(n) - c + l} \Leftrightarrow \mu^C < \left( \frac{1}{\gamma(1 - \varepsilon)} \right)^{\frac{1}{n-1}} \left( \frac{l}{f(n) - c + l} \right)^{\frac{1}{n-1}}. \quad [20]$$

327 This gives  $\mu^C \leq (l/(f(n) - c + l))^{1/(n-1)}$  in the  $(\gamma, \varepsilon) \rightarrow (1, 0)$  limit.

Moreover, in the limit where  $\varepsilon \rightarrow 0$ , [19] gives

$$\frac{1 - \mu^C}{1 - (\mu^C)^{n-1}} (\mu^C)^{n-1} (f(n) - c) \geq g \Leftrightarrow \frac{1}{\sum_{m=0}^{n-2} (\mu^C)^m} (\mu^C)^{n-1} (f(n) - c) \geq g.$$

Note that  $(\mu^C)^{n-1} / \sum_{m=0}^{n-2} (\mu^C)^m$  is increasing in  $\mu^C$ . Thus, this inequality, along with the previous upper bound for  $\mu^C$ , puts the following requirement on the parameters:

$$\frac{1 - \left( \frac{l}{f(n) - c + l} \right)^{\frac{1}{n-1}}}{\frac{f(n) - c}{f(n) - c + l}} \frac{l}{f(n) - c + l} (f(n) - c) \geq g,$$

328 which simplifies to

$$329 g \leq \left( 1 - \left( \frac{l}{f(n) - c + l} \right)^{\frac{1}{n-1}} \right) l. \quad [21]$$

330 So far we have established [21], which is a necessary condition on the  $g, l$  parameters for any cooperation to be sustainable  
331 with *GrimK* strategies in the  $(\gamma, \varepsilon) \rightarrow (1, 0)$  limit. We can further characterize the maximum limit share of cooperators in  
332 *GrimK* equilibria using very similar arguments as those in Lemmas 2 and 3.

**Theorem 16.**

$$\lim_{(\gamma, \varepsilon) \rightarrow (1, 0)} \bar{\mu}_n^C(\gamma, \varepsilon) = \begin{cases} \left( \frac{l}{f(n) - c + l} \right)^{\frac{1}{n-1}} & \text{if } g < \left( 1 - \left( \frac{l}{f(n) - c + l} \right)^{\frac{1}{n-1}} \right) l \\ 0 & \text{if } g > \left( 1 - \left( \frac{l}{f(n) - c + l} \right)^{\frac{1}{n-1}} \right) l \end{cases}.$$

333

334 Theorem 16 shows that *GrimK* strategies can support robust social cooperation in the  $n$ -player public goods game in much  
335 the same manner as in the 2-player PD. To see how this result reduces to Theorem 1 in the 2-player PD, note that  $f(2) - c = 1$ ,  
336 so  $(l/(f(n) - c + l))^{1/(n-1)} = l/(1 + l)$  when  $n = 2$ .

337 In the 2-player PD, we found that the class of *GrimK* strategies could achieve the same level of cooperation as a more  
338 general class of trigger strategies in the limit where  $(\gamma, \varepsilon) \rightarrow (1, 0)$ . We note that such a result holds here as well for the class of  
339 trigger strategies that satisfy: (i) The set of all possible records can be partitioned into two classes, “good records”  $G$  and “bad  
340 records”  $B$ . (ii) When  $n$  players meet, they all contribute if all of their records are good and none of them contribute if any  
341 one of them has a bad record. (iii) The class  $B$  is absorbing: if  $k \in B$ , then every record  $k'$  that can be reached starting at  
342 record  $k$  is also in  $B$ .

## 343 Appendix

### 344 Convergence Matlab Files.

```
345 % Parameters
346 gamma = 0.8;
347 epsilon = 0.02;
348 T = 100; % Time periods
349
350 % Grim1
351 k = 1;
352
353 % Initialize Cooperator Share Arrays
```

```

353 cooperat_share_high      = zeros(T,1);          % Highest trajectory
354 cooperat_share_steady    = 0.248359*ones(T,1); % Steady state
355 cooperat_share_low       = zeros(T,1);          % Lowest trajectory
356
357 % Initialize Period Share Distribution Arrays
358 share_distribution_high   = zeros(k,1);
359 share_distribution_high(1) = 1;                % Highest trajectory
360 share_distribution_low    = zeros(k,1); % Lowest trajectory
361
362 % Iterate Over Time Periods
363 for t = 1:T
364     % Highest Trajectory
365     cooperat_share_high(t) = sum(share_distribution_high); % Compute cooperat share
366     share_distribution_high = update_grim_k(gamma,epsilon,k,...
367         share_distribution_high); % Update period share distribution
368
369     % Lowest Trajectory
370     cooperat_share_low(t) = sum(share_distribution_low); % Compute cooperat share
371     share_distribution_low = update_grim_k(gamma,epsilon,k,...
372         share_distribution_low); % Update period share distribution
373 end
374
375 % Format Figure
376 t = 0:T-1;
377 dimensions = [0,0,10,6];
378 figure('units','inch','position',dimensions)
379 hold on
380 plot(t,cooperat_share_high,'-*','linewidth',2);
381 plot(t,cooperat_share_steady,'-*','linewidth',2);
382 plot(t,cooperat_share_low,'-*','linewidth',2);
383 hold off
384 set(gca,'TickLabelInterpreter','latex');
385 set(gca,'FontSize',32,'FontWeight','bold');
386 xlabel('Time (t$)','$Interpreter','latex');
387 yl = ylabel('Share of Cooperators ($\mu^{\text{C}}$)', 'Interpreter', 'latex');
388 yl.Position(1) = yl.Position(1) + abs(yl.Position(1) * 0.4);
389 yl.Position(2) = yl.Position(2) - abs(yl.Position(2) * 0.1);
390 ylim([0, 1]);
391 xlim([0,30]);
392 legend({'Highest Trajectory','Steady State','Lowest Trajectory'},...
393     'Location','northeast','Interpreter','latex');
394 set(gcf,'color','w');
395 hold off
396
397 %~~~~~%
398 % Grim2
399 k = 2;
400
401 % Initialize Cooperator Share Arrays
402 cooperat_share_high      = zeros(T,1);          % Highest trajectory
403 cooperat_share_high_steady = .985542*ones(T,1); % Highest steady state
404 cooperat_share_middle_steady = .918367*ones(T,1); % Middle steady state
405 cooperat_share_low_steady  = .647111*ones(T,1); % Lowest steady state
406 cooperat_share_low        = zeros(T,1);          % Lowest trajectory
407
408 % Initialize Period Share Distribution Arrays
409 share_distribution_high   = zeros(k,1);
410 share_distribution_high(1) = 1;                % Highest trajectory
411 share_distribution_low    = zeros(k,1); % Lowest trajectory
412
413 % Iterate Over Time Periods

```

```

476 for t = 1:T
477     % Highest Trajectory
478     cooperator_share_high(t) = sum(share_distribution_high); % Compute cooperator share
479     share_distribution_high = update_grim_k(gamma, epsilon, k, ...
480         share_distribution_high); % Update period share distribution
481
482     % Lowest Trajectory
483     cooperator_share_low(t) = sum(share_distribution_low); % Compute cooperator share
484     share_distribution_low = update_grim_k(gamma, epsilon, k, ...
485         share_distribution_low); % Update period share distribution
486 end
487
488 % Format Figure
489 t = 0:T-1;
490 dimensions = [0,0,10,6];
491 figure('units','inch','position',dimensions)
492 hold on
493 plot(t, cooperator_share_high, '-*', 'linewidth', 2);
494 plot(t, cooperator_share_high_steady, '-*', 'linewidth', 2);
495 plot(t, cooperator_share_middle_steady, '-*', 'linewidth', 2);
496 plot(t, cooperator_share_low_steady, '-*', 'linewidth', 2);
497 plot(t, cooperator_share_low, '-*', 'linewidth', 2);
498 hold off
499 set(gca, 'TickLabelInterpreter', 'latex');
500 set(gca, 'FontSize', 32, 'FontWeight', 'bold');
501 xlabel('Time ($t$)', 'Interpreter', 'latex');
502 yl = ylabel('Share of Cooperators ( $\mu^C$ )', 'Interpreter', 'latex');
503 yl.Position(1) = yl.Position(1) + abs(yl.Position(1) * 0.4);
504 yl.Position(2) = yl.Position(2) - abs(yl.Position(2) * 0.1);
505 ylim([0, 1]);
506 xlim([0, 30]);
507 legend({'Highest Trajectory', 'Highest Steady State', 'Middle Steady State', ...
508     'Lowest Steady State', 'Lowest Trajectory'}, 'Location', 'southeast', ...
509     'Interpreter', 'latex');
510 set(gcf, 'color', 'w');
511 hold off
512
513
514
515
516
517
518
519
520
521
522
523
524
525
526
527
528
529
530
531
532
533
534
535
536
537
538
539
540
541
542
543 function updated_share_distribution = update_grim_k(gamma, epsilon, k, ...
544     share_distribution)
545
546 % Initialize Updated Share Distribution Array
547 updated_share_distribution = zeros(k,1);
548
549 % Update Share Distribution Array
550 updated_share_distribution(1,1) = 1 - gamma + ...
551     gamma*(1 - epsilon)*sum(share_distribution)*share_distribution(1);
552
553 if k>1
554     for i = 2:k
555         updated_share_distribution(i,1) = ...
556             gamma*(1-(1-epsilon)*sum(share_distribution))*share_distribution(i-1)...
557             + gamma*(1-epsilon)*sum(share_distribution)*share_distribution(i);
558     end
559 end
560 end
561 end
562
563
564
565
566
567
568
569
570
571
572
573
574
575
576
577
578
579
580
581
582
583
584
585
586
587
588
589
590
591
592
593
594
595
596
597
598
599
600
601
602
603
604
605
606
607
608
609
610
611
612
613
614
615
616
617
618
619
620
621
622
623
624
625
626
627
628
629
630
631
632
633
634
635
636
637
638
639
640
641
642
643
644
645
646
647
648
649
650
651
652
653
654
655
656
657
658
659
660
661
662
663
664
665
666
667
668
669
670
671
672
673
674
675
676
677
678
679
680
681
682
683
684
685
686
687
688
689
690
691
692
693
694
695
696
697
698
699
700
701
702
703
704
705
706
707
708
709
710
711
712
713
714
715
716
717
718
719
720
721
722
723
724
725
726
727
728
729
730
731
732
733
734
735
736
737
738
739
740
741
742
743
744
745
746
747
748
749
750
751
752
753
754
755
756
757
758
759
760
761
762
763
764
765
766
767
768
769
770
771
772
773
774
775
776
777
778
779
780
781
782
783
784
785
786
787
788
789
790
791
792
793
794
795
796
797
798
799
800
801
802
803
804
805
806
807
808
809
810
811
812
813
814
815
816
817
818
819
820
821
822
823
824
825
826
827
828
829
830
831
832
833
834
835
836
837
838
839
840
841
842
843
844
845
846
847
848
849
850
851
852
853
854
855
856
857
858
859
860
861
862
863
864
865
866
867
868
869
870
871
872
873
874
875
876
877
878
879
880
881
882
883
884
885
886
887
888
889
890
891
892
893
894
895
896
897
898
899
900
901
902
903
904
905
906
907
908
909
910
911
912
913
914
915
916
917
918
919
920
921
922
923
924
925
926
927
928
929
930
931
932
933
934
935
936
937
938
939
940
941
942
943
944
945
946
947
948
949
950
951
952
953
954
955
956
957
958
959
960
961
962
963
964
965
966
967
968
969
970
971
972
973
974
975
976
977
978
979
980
981
982
983
984
985
986
987
988
989
990
991
992
993
994
995
996
997
998
999

```

```

474 % Parameters
475 gamma = 0.9;
476 epsilon = 0.1;
477 g = 0.4;
478 l = 2.8;
479 T = 100; % Time periods
480
481 % Normal - Grim5, Mutant - Grim1
482 k_normal = 5;
483 k_mutant = 1;
484 k = max(k_normal, k_mutant);
485
486 % Initialize Normal Cooperator Share Arrays
487 normal_cooperator_shares = zeros(T,1); % Time series
488 normal_cooperator_shares_steady = 0.899754*ones(T,1); % Steady state
489
490 % Initialize Normal Total Share Array
491 normal_total_share = zeros(T,1); % Time series
492 period_normal_total_share = 0.95; % Period value
493
494 % Initialize Normal Share Distribution Arrays
495 normal_share_distribution = zeros(T,k); % Time series
496 period_normal_share_distribution = zeros(1,k); % Period value
497
498 % Set initial normal share distribution to be proportional to steady state
499 % distribution
500 for i=1:k_normal
501     period_normal_share_distribution(1,i) = ...
502         period_normal_total_share*beta(gamma, epsilon, 0.899754)^(i-1) ...
503         *(1-beta(gamma, epsilon, 0.899754));
504 end
505
506 if k>k_normal
507     for i=k_normal+1:k
508         period_normal_share_distribution(1,i) = ...
509             period_normal_total_share*beta(gamma, epsilon, 0.899754)^(k_normal) ...
510             *gamma^(i-k_normal-1)*(1-gamma);
511     end
512 end
513
514 % Initialize Normal Average Payoff Array
515 normal_payoff = zeros(T,1);
516
517 % Initialize Mutant Total Share Array
518 mutant_total_share = zeros(T,1); % Time series
519 period_mutant_total_share = 1-period_normal_total_share; % Period value
520
521 % Initialize Mutant Share Distribution Arrays
522 mutant_share_distribution = zeros(T,k); % Time series
523 period_mutant_share_distribution = zeros(1,k); % Period value
524 period_mutant_share_distribution(1,1) = period_mutant_total_share; % Initial mutants have
525     record 0
526
527 % Initialize Mutant Average Payoff Array

```

```

561 mutant_payoff = zeros(T,1);
562
563 % Iterate Over Time Periods
564 for t = 1:T
565     % Update Shares
566     normal_total_share(t,1) = period_normal_total_share;
567     normal_share_distribution(t,:) = period_normal_share_distribution(1,:);
568     normal_cooperator_shares(t) = sum(period_normal_share_distribution(1,1:k_normal));
569     mutant_total_share(t,1) = period_mutant_total_share;
570     mutant_share_distribution(t,:) = period_mutant_share_distribution(1,:);
571
572     % Compute Period Payoffs
573     [period_normal_payoff,period_mutant_payoff] = ...
574         payoffs_general(g,l,k_normal,k_mutant,period_normal_total_share,...
575             period_normal_share_distribution,period_mutant_total_share,...
576             period_mutant_share_distribution);
577
578     % Update Payoff Time Series
579     normal_payoff(t,1) = period_normal_payoff;
580     mutant_payoff(t,1) = period_mutant_payoff;
581
582     % Compute Updated Period Shares
583     [period_normal_total_share,period_normal_share_distribution(1,:),...
584         period_mutant_total_share,period_mutant_share_distribution(1,:)]...
585     = dynamic_update_general(gamma,epsilon,k_normal,k_mutant,...
586         period_normal_total_share,period_normal_share_distribution(1,:),...
587         period_mutant_total_share,period_mutant_share_distribution(1,:),...
588         period_normal_payoff,period_mutant_payoff);
589
590 end
591
592
593 % Format Figures
594 t = 0:T-1;
595 dimensions = [0,0,10,6];
596
597 figure('units','inch','position',dimensions)
598 hold on
599 plot(t,normal_cooperator_shares,'-*','linewidth',1);
600 plot(t,normal_cooperator_shares_steady,'-*','linewidth',1);
601 set(gca,'TickLabelInterpreter','latex');
602 set(gca,'FontSize',24,'FontWeight','bold');
603 xlabel('Time ($t$)','Interpreter','latex');
604 yl = ylabel('Share of Normal Cooperators','Interpreter','latex');
605 yl.Position(1) = yl.Position(1) + abs(yl.Position(1) * 0.4);
606 yl.Position(2) = yl.Position(2) + abs(yl.Position(2) * 0.05);
607 ylim([.8, 1]);
608 xlim([0,60]);
609 legend({'$Grim5$ Cooperators','Steady State'},'Location','northeast',...
610     'Interpreter','latex');
611 set(gcf,'color','w');
612 hold off
613
614 figure('units','inch','position',dimensions)
615 hold on
616 plot(t,normal_payoff,'-*','linewidth',1);
617 plot(t,mutant_payoff,'-*','linewidth',1);
618 set(gca,'TickLabelInterpreter','latex');
619 set(gca,'FontSize',24,'FontWeight','bold');
620 xlabel('Time ($t$)','Interpreter','latex');
621 yl = ylabel('Average Payoffs','Interpreter','latex');

```



```

592 yl.Position(1) = yl.Position(1) + abs(yl.Position(1) * 0.25);
593 yl.Position(2) = yl.Position(2) + abs(yl.Position(2) * 0.2);
594 ylim([0, 1.5]);
595 xlim([0,60]);
596 legend({'$Grim5$ Players', '$Grim1$ Players'}, 'Location', 'northeast', ...
597       'Interpreter', 'latex');
598 set(gcf, 'color', 'w');
599 hold off

604

605 function f = beta(gamma, epsilon, cooperator_share)
606
607 f = gamma*(1-(1-epsilon)*cooperator_share)/(1-gamma*(1-epsilon)*cooperator_share);
608
609 end

610 function [ratio_normal, ratio_mutant] = ...
611     proper_ratios_general(period_normal_total_share, period_mutant_total_share, ...
612     period_normal_payoff, period_mutant_payoff)
613
614 if (period_normal_payoff>0) && (period_mutant_payoff>0)
615     ratio_normal = period_normal_total_share*period_normal_payoff / ...
616         (period_normal_total_share*period_normal_payoff + ...
617         period_mutant_total_share*period_mutant_payoff);
618     ratio_mutant = period_mutant_total_share*period_mutant_payoff / ...
619         (period_normal_total_share*period_normal_payoff + ...
620         period_mutant_total_share*period_mutant_payoff);
621 end
622
623 if (period_normal_payoff>0) && (period_mutant_payoff<=0)
624     ratio_normal = 1;
625     ratio_mutant = 0;
626 end
627
628 if (period_normal_payoff<=0) && (period_mutant_payoff>0)
629     ratio_normal = 0;
630     ratio_mutant = 1;
631 end
632
633 if (period_normal_payoff<=0) && (period_mutant_payoff<=0)
634     ratio_normal = period_normal_total_share / (period_normal_total_share + ...
635     period_mutant_total_share);
636     ratio_mutant = period_mutant_total_share / (period_normal_total_share + ...
637     period_mutant_total_share);
638 end
639
640 end

641 function [period_normal_payoff, period_mutant_payoff] = payoffs_general(g, l, ...
642     k_normal, k_mutant, period_normal_total_share, period_normal_share_distribution, ...
643     period_mutant_total_share, period_mutant_share_distribution)
644
645 normal_cooperator_share = sum(period_normal_share_distribution(1,1:k_normal));
646 mutant_cooperator_share = sum(period_mutant_share_distribution(1,1:k_mutant));
647
648 if k_normal>k_mutant
649     % Compute the Share of Mutant Players Misperceived by Normal Players
650     misperceived_mutant_share = ...
651         sum(period_mutant_share_distribution(1, k_mutant+1:k_normal));
652
653     % Compute "Total Population Payoffs"

```

```

654     total_normal_payoff = normal_cooperator_share*((normal_cooperator_share...
655         +mutant_cooperator_share)*1 - misperceived_mutant_share*1);
656     total_mutant_payoff = mutant_cooperator_share*(normal_cooperator_share...
657         +mutant_cooperator_share)*1 + ...
658         misperceived_mutant_share*normal_cooperator_share*(1+g);
659
660 end
661
662 if k_mutant>k_normal
663     % Compute the Share of Normal Players Misperceived by Mutant Players
664     misperceived_normal_share = sum(period_normal_share_distribution(1,k_normal+1:k_mutant)
665         );
666
667     % Compute "Total Population Payoffs"
668     total_normal_payoff = normal_cooperator_share*(normal_cooperator_share...
669         +mutant_cooperator_share)*1 + misperceived_normal_share*mutant_cooperator_share*(1+
670         g);
671     total_mutant_payoff = mutant_cooperator_share*...
672         ((normal_cooperator_share + mutant_cooperator_share)*1 - ...
673         misperceived_normal_share*1);
674
675 end
676
677 % Compute Average Payoffs
678 period_normal_payoff = total_normal_payoff/period_normal_total_share;
679 period_mutant_payoff = total_mutant_payoff/period_mutant_total_share;
680 end
681
682 function [updated_period_normal_total_share, updated_period_normal_share_distribution, ...
683     updated_period_mutant_total_share, updated_period_mutant_share_distribution] = ...
684     dynamic_update_general(gamma, epsilon, k_normal, k_mutant, ...
685         period_normal_total_share, period_normal_share_distribution, ...
686         period_mutant_total_share, period_mutant_share_distribution, ...
687         period_normal_payoff, period_mutant_payoff)
688
689 k = max(k_normal, k_mutant);
690
691 % Compute Ratios of Incoming Players that are Normal or Mutant
692 [ratio_normal, ratio_mutant] = ...
693     proper_ratios_general(period_normal_total_share, ...
694         period_mutant_total_share, period_normal_payoff, period_mutant_payoff);
695
696 % Compute Updated Total Share of Normal and Mutant Players
697 updated_period_normal_total_share = gamma*period_normal_total_share + (1-gamma)*
698     ratio_normal;
699 updated_period_mutant_total_share = gamma*period_mutant_total_share + (1-gamma)*
700     ratio_mutant;
701
702 % Initialize Updated Share Distribution Arrays
703 updated_period_normal_share_distribution = zeros(1,k);
704 updated_period_mutant_share_distribution = zeros(1,k);
705
706 % Compute Updated Period Normal Share Distribution
707
708 % Compute Share of Players Perceived as Cooperators by Normal Players
709 mu_c = sum(period_normal_share_distribution(1,1:k_normal)) + ...
710     sum(period_mutant_share_distribution(1,1:k_normal));
711
712 % Computed Updated Normal Shares
713 updated_period_normal_share_distribution(1,1) = ...
714     gamma*(1-epsilon)*mu_c*period_normal_share_distribution(1,1) + ...

```

```

735     (1-gamma)*ratio_normal;
736
737 for i=2:k_normal
738     updated_period_normal_share_distribution(1,i) = ...
739         gamma*(1-(1-epsilon)*mu_c)*period_normal_share_distribution(1,i-1) + ...
740         gamma*(1-epsilon)*mu_c*period_normal_share_distribution(1,i);
741 end
742
743 if k_mutant>k_normal
744     updated_period_normal_share_distribution(1,k_normal+1) = ...
745         gamma*(1-(1-epsilon)*mu_c)*period_normal_share_distribution(1,k_normal);
746
747 if k_mutant>k_normal+1
748     for i=k_normal+2:k_mutant
749         updated_period_normal_share_distribution(1,i) = ...
750             gamma*period_normal_share_distribution(1,i-1);
751     end
752 end
753
754 end
755
756 %%%%%%%%%%%%%%%%%%%%%%%%%%%%%%%%%%%%%%%%%%%%%%%%%%%%%%%%%%%%%%%%%%%%%%%%%%
757 % Compute Updated Period Mutant Share Distribution
758
759 % Compute Share of Players Perceived as Cooperators by Normal Players
760 mu_c = sum(period_normal_share_distribution(1,1:k_mutant)) + ...
761         sum(period_mutant_share_distribution(1,1:k_mutant));
762
763 % Computed Updated Mutant Shares
764 updated_period_mutant_share_distribution(1,1) = ...
765     gamma*(1-epsilon)*mu_c*period_mutant_share_distribution(1,1) + ...
766     (1-gamma)*ratio_mutant;
767
768 for i=2:k_mutant
769     updated_period_mutant_share_distribution(1,i) = ...
770         gamma*(1-(1-epsilon)*mu_c)*period_mutant_share_distribution(1,i-1) + ...
771         gamma*(1-epsilon)*mu_c*period_mutant_share_distribution(1,i);
772 end
773
774 if k_normal>k_mutant
775     updated_period_mutant_share_distribution(1,k_mutant+1) = ...
776         gamma*(1-(1-epsilon)*mu_c)*period_mutant_share_distribution(1,k_mutant);
777 end
778
779 if k_normal>k_mutant+1
780     for i=k_mutant+2:k_normal
781         updated_period_mutant_share_distribution(1,i) = ...
782             gamma*period_mutant_share_distribution(1,i-1);
783     end
784 end
785
786 end

```

767

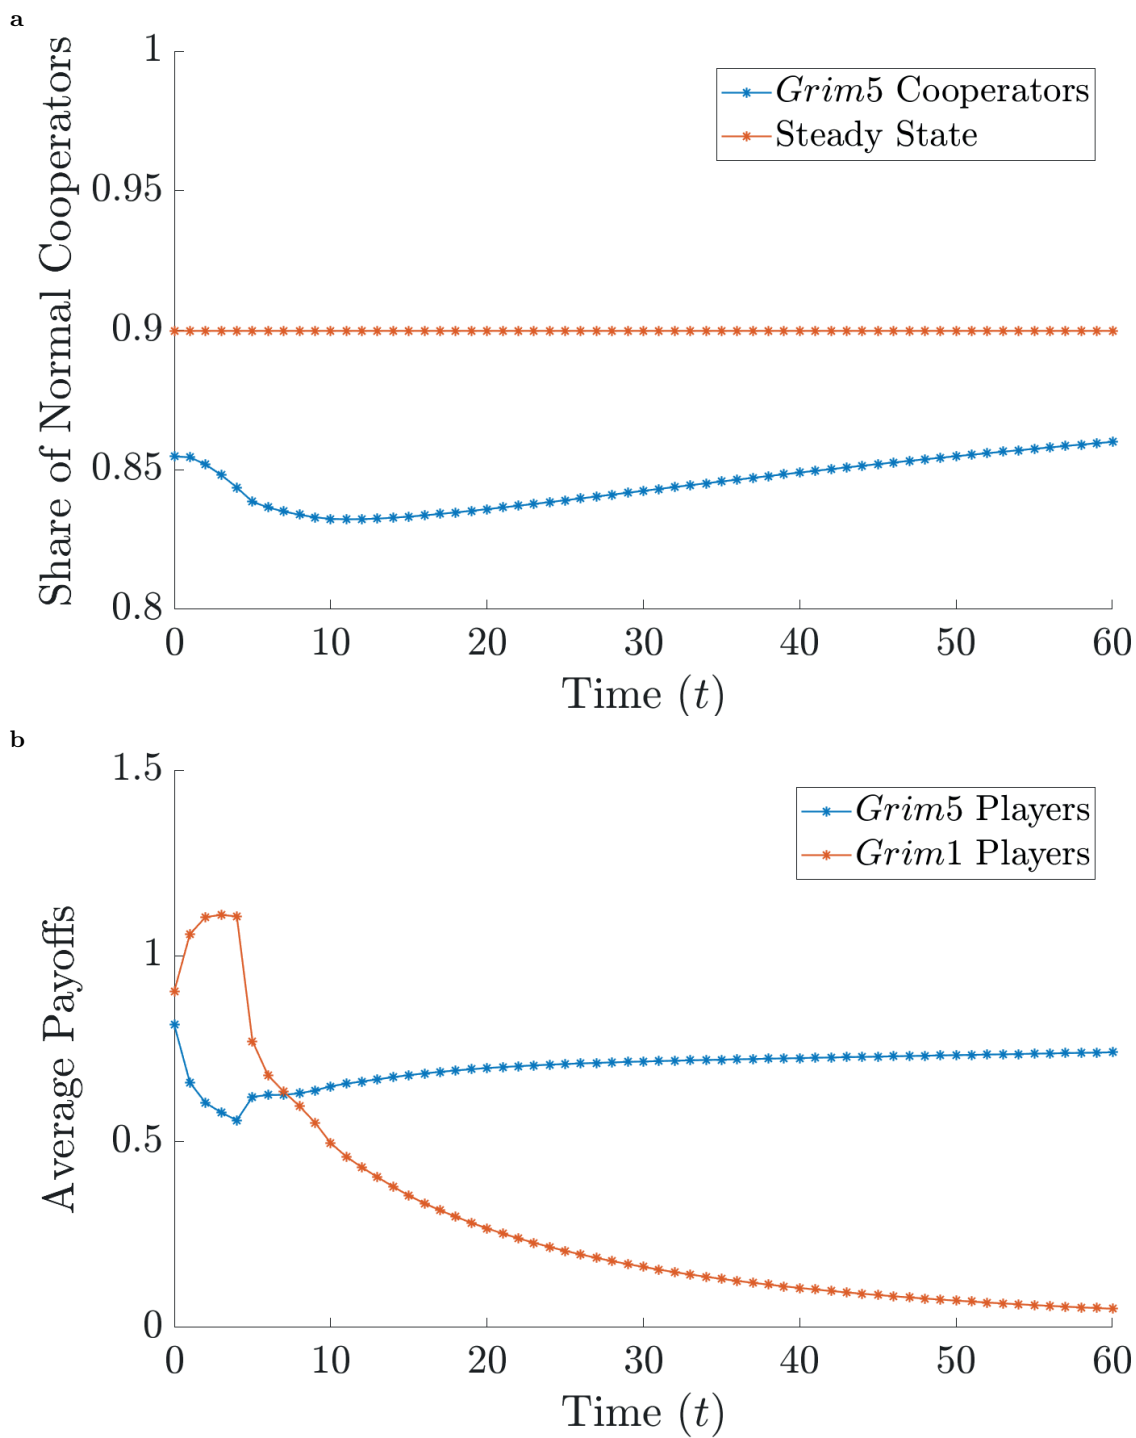

**Fig. S1. Evolutionary dynamics.** **a**, The blue curve depicts the evolution of the share of players that use *Grim5* and are cooperators (i.e. have some record  $k < 5$ ). **b**, The average payoffs in the normal *Grim5* population (blue curve) and in the mutant *Grim1* population (red curve).

768

769 **References**

- 770 1. JW Friedman, A non-cooperative equilibrium for supergames. *The Review of Economic Studies* **38**, 1–12 (1971).  
 771 2. D Fudenberg, E Maskin, The folk theorem in repeated games with discounting or with incomplete information. *Econometrica*  
 772 **54**, 533 (1986).

- 773 3. RJ Aumann, LS Shapley, Long-term competition—a game-theoretic analysis in *Essays in Game Theory*. (Springer), pp.  
774 1–15 (1994).
- 775 4. D Fudenberg, D Levine, E Maskin, The Folk Theorem with Imperfect Public Information. *Econometrica* **62**, 997–1039  
776 (1994).
- 777 5. M Kandori, H Matsushima, Private Observation, Communication and Collusion. *Econometrica* **66**, 627 (1998).
- 778 6. Y Joe, A Iwasaki, M Kandori, I Obara, M Yokoo, Automated Equilibrium Analysis of Repeated Games with Private  
779 Monitoring: A POMDP Approach in *Conference on Autonomous Agents and Multiagent Systems*. pp. 1305–1306 (2012).
- 780 7. O Compte, A Postlewaite, Plausible cooperation. *Games and Economic Behavior* **91**, 45–59 (2015).
- 781 8. J Deb, T Sugaya, A Wolitzky, The Folk Theorem in Repeated Games with Anonymous Random Matching. (2018).
- 782 9. R Axelrod, WD Hamilton, The evolution of cooperation. *Science (New York, N.Y.)* **211**, 1390–6 (1981).
- 783 10. R Boyd, JP Lorberbaum, No pure strategy is evolutionarily stable in the repeated prisoner’s dilemma game. *Nature* **327**,  
784 58 (1987).
- 785 11. R Boyd, PJ Richerson, The evolution of indirect reciprocity. *Social Networks* **11**, 213 – 236 (1989) Special Issue on  
786 Non-Human Primate Networks.
- 787 12. J Farrell, R Ware, Evolutionary stability in the repeated prisoner’s dilemma. *Theoretical Population Biology* **36**, 161–166  
788 (1989).
- 789 13. D Fudenberg, E Maskin, Evolution and cooperation in noisy repeated games. *American Economic Review: Papers and*  
790 *Proceedings* **80**, 274 (1990).
- 791 14. KG Binmore, L Samuelson, Evolutionary stability in repeated games played by finite automata. *Journal of Economic*  
792 *Theory* **57**, 278 – 305 (1992).
- 793 15. MA Nowak, RM May, Evolutionary games and spatial chaos. *Nature* **359**, 826 (1992).
- 794 16. MA Nowak, K Sigmund, Tit for tat in heterogeneous populations. *Nature* **355**, 250 (1992).
- 795 17. M Nowak, K Sigmund, A strategy of win-stay, lose-shift that outperforms tit-for-tat in the prisoner’s dilemma game.  
796 *Nature* **364**, 56 (1993).
- 797 18. J Bendor, P Swistak, Types of evolutionary stability and the problem of cooperation. *Proceedings of the National Academy*  
798 *of Sciences* **92**, 3596–3600 (1995).
- 799 19. R Axelrod, RA Hammond, A Grafen, Altruism via kin-selection strategies that rely on arbitrary tags with which they  
800 coevolve. *Evolution* **58**, 1833–1838 (2004).
- 801 20. MA Nowak, A Sasaki, C Taylor, D Fudenberg, Emergence of cooperation and evolutionary stability in finite populations.  
802 *Nature* **428**, 646 (2004).
- 803 21. MA Nowak, Five rules for the evolution of cooperation. *Science* **314**, 1560–1563 (2006).
- 804 22. LA Imhof, D Fudenberg, MA Nowak, Tit-for-tat or win-stay, lose-shift? *Journal of Theoretical Biology* **247**, 574–580  
805 (2007).
- 806 23. S Bowles, H Gintis, *A cooperative species: Human reciprocity and its evolution*. Princeton, NJ, US. (Princeton University  
807 Press), (2011).
- 808 24. DG Rand, H Ohtsuki, MA Nowak, Direct reciprocity with costly punishment: generous tit-for-tat prevails. *Journal of*  
809 *Theoretical Biology* **256**, 45–57 (2009).
- 810 25. A Bear, DG Rand, Intuition, deliberation, and the evolution of cooperation. *Proceedings of the National Academy of*  
811 *Sciences* **113**, 936–941 (2016).
- 812 26. JD Fearon, DD Laitin, Explaining interethnic cooperation. *American Political Science Review* **90**, 715–735 (1996).
- 813 27. D Fudenberg, DG Rand, A Dreber, Slow to Anger and Fast to Forgive: Cooperation in an Uncertain World. *American*  
814 *Economic Review* **102**, 720–749 (2012).
- 815 28. P Dal Bó, GR Fréchette, On the Determinants of Cooperation in Infinitely Repeated Games: A Survey. *Journal of*  
816 *Economic Literature* **56**, 60–114 (2018).
- 817 29. A Dreber, DG Rand, D Fudenberg, MA Nowak, Winners don’t punish. *Nature* **452**, 348 (2008).
- 818 30. DG Rand, A Dreber, T Ellingsen, D Fudenberg, MA Nowak, Positive interactions promote public cooperation. *Science*  
819 **325**, 1272–1275 (2009).
- 820 31. RW Rosenthal, Sequences of Games with Varying Opponents. *Econometrica* **47**, 1353–1366 (1979).
- 821 32. M Kandori, Social Norms and Community Enforcement. *The Review of Economic Studies* **59**, 63 (1992).
- 822 33. G Ellison, Cooperation in the prisoner’s dilemma with anonymous random matching. *The Review of Economic Studies* **61**,  
823 567–588 (1994).
- 824 34. JE Harrington Jr, Cooperation in a one-shot prisoners’ dilemma. *Games and Economic Behavior* **8**, 364–377 (1995).
- 825 35. S Takahashi, Community enforcement when players observe partners’ past play. *Journal of Economic Theory* **145**, 42–62  
826 (2010).
- 827 36. Y Heller, E Mohlin, Observations on Cooperation. *Review of Economic Studies* **85**, 2253–2282 (2018).
- 828 37. JI Bulow, JD Geanakoplos, PD Klemperer, Multimarket oligopoly: Strategic substitutes and complements. *Journal of*  
829 *Political Economy* **93**, 488–511 (1985).
- 830 38. D Fudenberg, J Tirole, The fat-cat effect, the puppy-dog ploy, and the lean and hungry look. *American Economic Review*  
831 **74**, 361–366 (1984).
- 832 39. X Vives, Nash equilibrium with strategic complementarities. *Journal of Mathematical Economics* **19**, 305–321 (1990).
- 833 40. P Milgrom, J Roberts, Rationalizability, learning, and equilibrium in games with strategic complementarities. *Econometrica*

- 834 **58**, 1255–1277 (1990).
- 835 41. K Sigmund, Moral assessment in indirect reciprocity. *Journal of Theoretical Biology* **299**, 25–30 (2012).
- 836 42. MA Nowak, K Sigmund, Evolution of indirect reciprocity by image scoring. *Nature* **393**, 573–577 (1998).
- 837 43. MA Nowak, K Sigmund, The dynamics of indirect reciprocity. *Journal of Theoretical Biology* **194**, 561–574 (1998).
- 838 44. H Ohtsuki, Y Iwasa, How should we define goodness?—reputation dynamics in indirect reciprocity. *Journal of Theoretical*  
839 *Biology* **231**, 107–120 (2004).
- 840 45. FP Santos, FC Santos, JM Pacheco, Social norm complexity and past reputations in the evolution of cooperation. *Nature*  
841 **555**, 242 (2018).
- 842 46. C Wedekind, M Milinski, Cooperation through image scoring in humans. *Science* **288**, 850–852 (2000).
- 843 47. O Leimar, P Hammerstein, Evolution of cooperation through indirect reciprocity. *Proceedings of the Royal Society of*  
844 *London. Series B: Biological Sciences* **268**, 745–753 (2001).
- 845 48. M Milinski, D Semmann, HJ Krambeck, Reputation helps solve the ‘tragedy of the commons’. *Nature* **415**, 424 (2002).
- 846 49. MA Fishman, Indirect reciprocity among imperfect individuals. *Journal of Theoretical Biology* **225**, 285–292 (2003).
- 847 50. N Takahashi, R Mashima, The importance of subjectivity in perceptual errors on the emergence of indirect reciprocity.  
848 *Journal of Theoretical Biology* **243**, 418–436 (2006).
- 849 51. U Berger, Learning to cooperate via indirect reciprocity. *Games and Economic Behavior* **72**, 30 – 37 (2011).
- 850 52. A Lotem, MA Fishman, L Stone, Evolution of cooperation between individuals. *Nature* **400**, 226 (1999).
- 851 53. K Panchanathan, R Boyd, A tale of two defectors: the importance of standing for evolution of indirect reciprocity. *Journal*  
852 *of Theoretical Biology* **224**, 115–126 (2003).
- 853 54. R Sugden, *The Economics of Rights, Co-operation and Welfare*. (Basil Blackwell, Oxford), (1986).
- 854 55. M Okuno-Fujiwara, A Postlewaite, Social Norms and Random Matching Games. *Games and Economic Behavior* **9**, 79–109  
855 (1995).
- 856 56. M Milinski, D Semmann, TC Bakker, HJ Krambeck, Cooperation through indirect reciprocity: image scoring or standing  
857 strategy? *Proceedings of the Royal Society of London. Series B: Biological Sciences* **268**, 2495–2501 (2001).
- 858 57. H Brandt, K Sigmund, The logic of reprobation: assessment and action rules for indirect reciprocation. *Journal of*  
859 *Theoretical Biology* **231**, 475–486 (2004).
- 860 58. H Brandt, K Sigmund, Indirect reciprocity, image scoring, and moral hazard. *Proceedings of the National Academy of*  
861 *Sciences* **102**, 2666–2670 (2005).
- 862 59. JM Pacheco, FC Santos, FAC Chalub, Stern-judging: A simple, successful norm which promotes cooperation under  
863 indirect reciprocity. *PLoS Computational Biology* **2**, e178 (2006).
- 864 60. H Ohtsuki, Y Iwasa, Global analyses of evolutionary dynamics and exhaustive search for social norms that maintain  
865 cooperation by reputation. *Journal of Theoretical Biology* **244**, 518–531 (2007).
- 866 61. S Uchida, K Sigmund, The competition of assessment rules for indirect reciprocity. *Journal of Theoretical Biology* **263**,  
867 13–19 (2010).
- 868 62. M Nakamura, N Masuda, Indirect reciprocity under incomplete observation. *PLoS Computational Biology* **7**, e1002113  
869 (2011).
- 870 63. H Ohtsuki, Y Iwasa, The leading eight: social norms that can maintain cooperation by indirect reciprocity. *Journal of*  
871 *Theoretical Biology* **239**, 435–444 (2006).
- 872 64. HA Hopenhayn, Entry, exit, and firm dynamics in long run equilibrium. *Econometrica* **60**, 1127–1150 (1992).
- 873 65. B Jovanovic, Selection and the evolution of industry. *Econometrica* **50**, 649–670 (1982).
- 874 66. J Hörner, W Olszewski, The folk theorem for games with private almost-perfect monitoring. *Econometrica* **74**, 1499–1544  
875 (2006).
- 876 67. G Hardin, The tragedy of the commons. *Science* **162**, 1243–1248 (1968).
- 877 68. RM Dawes, Social dilemmas. *Annual Review of Psychology* **31**, 169–193 (1980).
- 878 69. F Berkes, D Feeny, BJ McCay, JM Acheson, The benefits of the commons. *Nature* **340**, 91 (1989).
- 879 70. E Ostrom, *Governing the commons: The evolution of institutions for collective action*. (Cambridge University Press),  
880 (1990).
- 881 71. D Semmann, HJ Krambeck, M Milinski, Strategic investment in reputation. *Behavioral Ecology and Sociobiology* **56**,  
882 248–252 (2004).
- 883 72. JO Ledyard, JH Kagel, AE Roth, Handbook of experimental economics. *Public Goods: A Survey of Experimental Research*,  
884 111–194 (1995).
- 885 73. E Fehr, S Gächter, Cooperation and punishment in public goods experiments. *American Economic Review* **90**, 980–994  
886 (2000).
- 887 74. M Olson, *The logic of collective action*. (Harvard University Press) Vol. 124, (2009).
- 888 75. T Bergstrom, L Blume, H Varian, On the private provision of public goods. *Journal of Public Economics* **29**, 25–49 (1986).
